# Supplementary material for: The Landslide Velocity
Source: Copernicus journal article supplement (doi:10.5194/esurf-2021-81), 2021-11-30
Supplement: Supplementary file [file esurf-2021-81-AC3-supplement.pdf]

Dr. Jens Turowski  
Associate Editor  
Earth Surface Dynamics

**Revised Submission: MS # eSurf-2021-81**

Dear Dr. Turowski,  
we very much appreciate the Reviewers and yourself for supporting our work. Our sincere thanks to the Reviewers for their time and constructive comments and explicit suggestions that resulted in the substantially improved manuscript in which we appropriately addressed all the concerns raised, including the presentation, length and the clarity of the paper. Included are the Response to Reviewer #1, Response to Reviewer #2, marked-up, and clear manuscripts. Please also see below the updated responses to reviewers which are now compatible with the revised manuscript. In the marked-up manuscript, the removed texts are in red and the edited/added texts are in blue color.

We hope that the revised manuscript will be suitable for publication in eSurf. We look forward to hearing from you soon.

With best regards,

Shiva P. Pudasaini, Michael Krautblatter  
Technical University of Munich

# Response to Reviewer-1: MS #: eSurf-2021-81

Reviewer's comments are denoted by C and our responses are denoted by R, respectively. In the marked-up manuscript, the removed texts are in red and the edited/added texts are in blue color.

## General comments

C: This manuscript presented a simple and physics-based general analytical landslide velocity model which helps solve more landslide problems. The logic of the manuscript is clear, and the structure is reasonable, but there are still some problems.

R: We very much appreciate the Reviewer for supporting our work. Our sincere thanks to the Reviewer for your time and constructive comments and explicit suggestions that results in the substantially improved manuscript in which we appropriately address all the concerns you raised.

## Specific comments

C1.: In my opinion, the title of this manuscript should be modified. You can make it more specific. It can't be seen from the current title that what you introduce in your article is related to landslide speed model.

R1.: Thank you very much for the suggestion. We can understand the reviewer's concern. We also thought to change the title to "A novel class of non-linear advective - dissipative system". We can be open to this choice. There are two major aspects of this manuscript. First, the development of the new Landslide Velocity equation (5), which, based on the physical parameters, involved forces and the dynamics, namely, the net driving and the resisting forces, presents a novel class of non-linear advective - dissipative system, the physical-mathematical model for landslide velocity. This has been exclusively discussed in Section 2.3. Second, construction of several novel exact analytical solutions to the model (5) for the velocity of the landslide. So, the overall essence of the manuscript is on the landslide velocity. The nice thing is that the same equation (5) can describe many different natural and physical phenomena by appropriately changing  $u$  (the velocity) to any relevant state variable. Even the simplified version of (5); the equation (6) or (10); can describe wide range of physical phenomena, including: the Schrödinger equation, the Ermakov-Pinney, and the Friedmann equations in physical cosmology (<https://arxiv.org/pdf/2112.11526.pdf>). However, since our principle model is developed for velocity, and the manuscript is in the earth science journal, we think that the present title of the manuscript fits very well to what it describes. Also, the title as it stands now is nice. Whatever we call it, scientific communities may use the general exact analytical solutions constructed here to the context it fits to their interests.

C2.: Figure 3 is the combination of Figure 1 and Figure 2. There is no need to draw it again.

R2.: Thanks a lot for this legitimate suggestion. Fig. 3 will be removed, and the text improved accordingly.

C3.: The conclusion could have been a little more concise and organized. It can be divided into 1, 2 and 3 points.

R3.: We can make the Conclusion [Summary] much more concise and reduce it substantially by focusing only to the major outcomes. However, we think, it looks nicer in a plain text without dividing into points.

C4.: In Fig.10, Which graph represents the initial conditions  $s_0(x) = x^{0.50}$  (top panel) or  $s_0(x) = x^{0.65}$  (bottom panel)? In Fig.14, Which graph represents the initial conditions  $\beta = 0.0019$  or  $\beta = 0.019$ ? The different initial conditions should be represented in the diagram so that we can quickly distinguish between them.

R4.: The caption of Fig.10 will be improved, where, "The profiles correspond to the initial conditions  $s_0(x) = x^{0.50}$  (top panel) and  $s_0(x) = x^{0.65}$  (bottom panel), respectively." will read "The profiles evolve based on the initial conditions  $s_0(x) = x^{0.50}$  (top panel, at  $t = 0.0$  s) and  $s_0(x) = x^{0.65}$  (bottom panel, at  $t = 0.0$  s), respectively." In Fig.14,  $\beta = 0.0019$  and  $\beta = 0.019$  will be placed in the top and bottom figure panels, respectively. And, the figure caption will be improved consistently, from "The top panel with drag  $\beta = 0.0019$ ,

while the bottom panel with higher drag,  $\beta = 0.019$ , which strongly controls the wave breaking and folding, and also the magnitude of the landslide velocity.” to “The top panel with lower drag, while the bottom panel with higher drag, showing the drag strongly controls the wave breaking and folding, and also the magnitude of the landslide velocity.”

C5.: In section 6.1: “the significant to large large geometric deformations” is not written correctly?

R5.: We change it to: “the significant to large geometric deformations”

## Response to Reviewer-2: MS #: eSurf-2021-81

Reviewer's comments are denoted by C and our responses are denoted by R, respectively. In the marked-up manuscript, the removed texts are in red and the edited/added texts are in blue color.

### General comments

C. The paper by Pudasaini & Krautblatter presents a series of detailed analytical solutions for the calculation of the velocity of a landslide, by considering the depth-averaged forms of incompressible mass and momentum conservation equations for a mixture of solid materials and a liquid (treated as a single-phase flowing material) as a starting point. It is shown that the analytic solutions though they are simplifications of the reality can capture many crucial mechanisms, such as the longitudinal stretching (the model remains 2D) of the mass during its movement along the slope, wave breaking and landslide folding. Moreover, simplified versions of the new analytic equations (equations numbered 11, 19 and 39-40 in the manuscript) allow to retrieve other simplified existing models, such as the ones given by solving the center of mass model developed by Voellmy –initially for snow avalanches– or the inviscid Burgers equations developed in fluid mechanics.

I found the scientific content of the paper very interesting with many interesting ideas discussed all along the development of these new analytic equations for the velocity of a landslide. Moreover I think that the paper is a nice piece of work for educational purposes, though I have some concerns regarding the presentation (see my general recommendation below).

The equations proposed by Pudasaini and Krautblatter remain a simplification of the reality but they take into account several key contributions to describe the motion of a landslide and thus are powerful tools to assess landslide risk and conduct relevant calculations for practitioners who are in charge of the hazard quantification and mitigation. They can complement more sophisticated calculations based on complicated numerical simulations, better than current analytic solutions based on center of mass models largely used in engineering (Voellmy-type models) can do.

As such, I have a very positive feeling on this work. However, I have a number of concerns that need to be addressed before I can definitely recommend it for publication.

The scientific content is very good and very interesting, overall. My concerns are on the presentation of the material. I must say that the paper was very difficult to digest (though I was excited to read it!). I really think the authors need to revise a lot the presentation to make the paper shorter and clearer.

R: We very much appreciate the Reviewer for supporting our work. Our sincere thanks to the Reviewer for your time and constructive comments and explicit suggestions that results in the substantially improved manuscript in which we appropriately address all the concerns you raised, including the presentation, length and the clarity of the paper. In the original submission, we thought we appropriately choose some words and phrases that would fit with the spirit of the text and would pleasure the readers, which however, will now be removed or made milder according to the reviewer's suggestions.

C: Here are some suggestions for that purpose:

C 1): the introduction is very very long: it really needs to be revised and shortened. There are a number of arguments repeated. I don't think that the authors need to oversell their results. They just need to present the facts and summarize them, this will be more efficient.

R 1): Thank you very much for this very reasonable suggestion. The Introduction was about one and a half page long in the initial submission, which we thought was ok for a professional paper. We do not intend to overvalue the work, but realize we need to considerably improve the presentation. However, we agree with the reviewer that there are number of statements repeated. Following your suggestion, we will present the facts and summarize them in a much more efficient and concise way resulting in substantially reduced Introduction.

C 2): I would suggest the authors to change the organization of the paper by starting with a presentation of the new analytic solutions: firstly with section 3.2 (eq 11), secondly with section 4 (eq. 19) and thirdly with section 5 (eqs 39-40). The simpler solutions for steady-state motion (eqs. 6, 7, 8) can be shortly presented as specific cases, after eq 11 or even in a supplementary material. The manuscript needs to be shortened.

R 2): We understand the reviewer's idea of first presenting the main general solutions, then collect all simpler solutions, or put them in a supplementary. We appreciate for this suggestion. However, the spirit of the ms is first to present simple solutions, similar to those available in literature, that many readers may be acquainted with. Then, tell what was not included or was not possible in the existing models, solutions and approaches, what we need to generalize and how we can achieve them. We presented the general solutions, then showed how those solutions can do more than existing ones, while in the mean time we analytically proved that our general solutions can directly recover all existing solutions as special cases. We think this way Sections 3-5 are well structured, smooth, easy to follow, also well formulated for educational uses. We hope the readers will like it. However, we have now identified many places where we can still substantially reduce Sections 3-5. We ask for the reviewer's support for this.

C 3): the summary section (section 7) is very long, with many repetitions again. And most of the material is already clear and said in the discussion section (section 6) or elsewhere in the paper. I think the summary section should be removed. If there are key ideas in the section 7 which the authors want to keep, they should be moved to the section 6 then and that's it.

R 3): We agree that there are many repetitions. In revising the ms, we remove all repetitions from Section 6, reducing it substantially. We will clearly re-write Section 6 to discuss the main results, while Section 7 will summarize the main findings, but without overlap. Moreover, we will largely reduce Section 7, making it much concise. This way it will be better.

C 4): there many superlatives or sentences that intend to praise the work done by the authors. Please let the readers themselves appreciate the quality of your work! I think those superlatives or statements that oversell your work are not needed and should be removed: see my suggestions in the list of specific comments below.

R 4): Some specific words were used to make it clearer the importance of the new findings as they are from the physical and mathematical ground, but we do not aspire to exaggerate. However, respecting the reviewer's suggestion we improve the text while revising it, and remove the suggested words and phrases.

### Specific comments

C 1. 30-31: in some (slow) flow regimes, the impact of a landslide may be more a consequence of its total mass (size/volume) than a consequence of its velocity. And the velocity is not the prevailing parameter to estimate the impact force in this case. I think the statement at l. 30-31 should be qualified or, even better, this last sentence of the abstract can be removed (the impact force is not addressed in the current paper).

R: We understand the reviewer's concern. Our model and analytical solutions are general. Landslide velocity are relatively high. Most of the velocity solutions we have presented are on the order of 10s of m/s close to observed fast landslide motions, also explained in the text. The impact forces are proportional to the square of velocity. Here is where the velocity plays the crucial role in estimating the destructive power of the landslide. So, what we said is essential/fits well to the essence of the manuscript, and we would like to keep this sentence.

C 1. 135: I don't understand  $\alpha_s = 1$  ... I guess that we have:  $\rho_{mixture} = \alpha_s \rho_s + (1 - \alpha_s) \rho_f$ . The dry landslide case thus corresponds to  $\gamma$  that tends toward 1 ( $\gamma$  is equal to an epsilon when  $\rho_f$  is the density of air and very small compared to the grain material density  $\rho_s$  but is never zero in fact in an "air environment") and  $\alpha_s$  is the volume fraction of the grains in air, which is restricted to the maximum random close packing (always smaller than 1) of the granular medium ? Please check/fix this.

R: Thanks for the comment. However, here we consider the mixture of solid and fluid (water plus colloids), but do not consider air. So, in the limit of vanishing fluid, the description of the limiting solid fraction as  $\alpha_s = 1$

is consistent. And, since there is no buoyancy,  $\gamma = 0$ .

C l. 155: “genuinely” should be removed.

R: We agree to remove. Line (L) 169 (of the revised marked-up ms).

C: I’m not sure that section 2.3 is needed: there are many arguments presented here that are repeated all along the manuscript and in the section 6 (and 7) again. This section may be removed to shorten the manuscript/avoid repetitions. The main lines could be added after the key eq 5 (end of previous section 2.2) and that’s it.

R: This section is very important and will have a lasting impact. It has been designed to clearly explain the physical, mathematical and engineering aspects of the main model (5) in a unified way. Furthermore, it describes how the new equation (5) extends the widely used classical non-linear inviscid Burgers’ equation, classical shallow water equation, and the classical Voellmy model, beyond the current state. So, it is essential to keep this section. However, we still reduce its length as much as possible (L169-181).

C l. 179: “... superior over...” I don’t know if this a good statement to keep. This could be replaced by “... prior to...”. I think the most important is to understand the foundation of the physical equations and make “them talk” by considering asymptotic solutions (first step) before launching sophisticated simulations based on those physical equations that are solved by complicated numerical schemes (second step). Sometime modelers forget the first step which is very useful to interpret complicated simulations and/or avoid mistakes in the second step. I would say for instance: “... and are often needed as a prerequisite before running numerical simulations based on complicated numerical schemes (yet based on the same physics in the end).”

R: We agree. Following the suggestion, we improve the text, which will read (L190-201): “Physically meaningful exact solutions explain the true and entire nature of the problem associated with the model equation (Pudasaini, 2011; Faug, 2015), and thus, should be developed, analyzed and properly understood prior to numerical simulations. These exact analytical solutions provide important insights into the full flow behavior of the complex system (Pudasaini and Krautblatter, 2021), and are often needed to calibrate and validate the numerical solutions (Pudasaini, 2016) as a prerequisite before running numerical simulations based on complex numerical schemes. This is very useful to interpret complicated simulations and/or avoid mistakes associated with numerical simulations.”

C l. 191-192: eq 6 reduces to the center of mass model for a dry landslide if  $\gamma = 0$  (or  $\rho_f$  is very small compared to  $\rho_s$ ). Maybe this should be specified here.

R: The text will be enhanced as follows (L213-214): “Classically, (6) is called the center of mass velocity of a dry avalanche of flow type (Perla et al., 1980).” changing to “Classically, (6) is called the center of mass velocity of a dry avalanche of flow type (Perla et al., 1980) for  $\gamma = 0, \alpha_s = 1, K = 1$ , and for negligible free-surface pressure gradient. This has been discussed in detail in Section 3.2.”

C: figure 3: the 2 plots are already presented in figures 1 and 2. Either you remove figure 3 or I wonder whether you could consider instead some normalized versions of the plots: velocity/ $U_o$  versus  $x/L_o$  (top plot) and velocity/ $U_o$  versus  $t/T_o$  (bottom plot), where  $U_o = \sqrt{(\alpha/\gamma)}$ ,  $L_o = 1500\text{m}$ , and  $T_o = L_o/U_o$ .

R: This figure will be removed, Page (P) 9.

C l. 273: “This is a fantastic situation.” can be removed.

R: We think it is better to change it to “This is remarkable.”, L297-298, otherwise we will remove it.

C l. 299: a strong shaking is an example of an initial input of strong kinetic energy but other situations are possible when a high potential energy is available and is converted quasi-instantaneously into kinetic energy (e.g. when the vertical drop of the detachment area is huge and combined with a high slope angle of the terrain).

R: Thanks for the suggestion. The text will be expanded incorporating your suggestion as (L324-328): “e.g., by

a strong seismic shacking, or when a high potential energy is available and is converted quasi-instantaneously into kinetic energy (the situation prevails when the vertical height drop of the detachment area is huge and the slope angle of the terrain is high).”

C l. 334: “unique” can be removed or replaced by another word (like “interesting”) to tone down the statement.

R: We agree to remove, L365.

C l. 336 and 339: I’m not sure that “maximum” is adequate here. Why not using something like  $U_s - s$  or  $U_{infinity}$  for the steady-state value?

R: We understand the concern. The reason for choosing this terminology has been explained after (16) as (L367-368) “where,  $u_{max}$  represents the maximum possible velocity during the motion as obtained from the (long-time) steady-state behaviour of the landslide” taking the upper limit of the velocity down the entire track. So, the term is meaningfully used.

C l. 344-354: this is a classical discussion, already addressed for the classical center of mass models. Please note that this discussion could be extended/updated by considering more recent approaches on center of mass models which considered some prescribed shapes for the profiles of the terrain, such as cycloidal and parabolic tracks (e.g. see Gauer CRST 2018).

R: Many thanks for providing the useful and relevant reference. We insert the following text while revising (L386-390): “We mention that, for two-dimensional cycloidal or parabolic tracks, Gauer (2018) presented analytical velocities for the mass block motions with simple dry Coulomb or constant energy dissipation along the track. For such idealized path geometries he found an important relationship: that the maximum front-velocity,  $U_{max}$ , of major snow avalanches scales with the total drop height of the track,  $H_{sc}$ :  $U_{max} \sim \sqrt{gH_{sc}/2}$ , where  $g$  is the gravity constant. Within its scope, this simple relationship may be applied to estimate the maximum velocity in (17).” [Gauer, P. (2018): Considerations on scaling behavior in avalanche flow along cycloidal and parabolic tracks. Cold Regions Science and Technology 151, 34-46.]

C l. 461-462: regardless of the model discussed, either the classical center of mass models or your model proposed here, I think that such models give upper bounds because they are not considering (by nature) the lateral spreading of the mass of the mixture when coming to rest. Such 3D (or 2D lateral spreading) effects when they are considered should give lower velocities and run-out. Please be careful and keep in mind that your more realistic model (I agree) can also give overestimates then. This is the reason why full 3D numerical simulations on a digital terrain model are needed too.

R: We agree. While revising, we improve the text by adding (L500-505): “However, the reduced dimensional models and solutions considered here may give upper bounds to reality because they do not account for the lateral spreading of the landslide mass. Such problems can only be solved comprehensively by considering the numerical simulations on a full three-dimensional digital terrain model (Mergili et al., 2020; Shugar et al., 2021) by employing the full dynamical mass flow model equations (Pudasaini and Mergili, 2019) without constraining the lateral spreading.”

C l. 530: why choosing the powers 0.5 or 0.65? Is it fully arbitrary or do you have some arguments?

R: No, we can take any functions, as we have mentioned (L572-573): “Any initial condition can be applied to the solution system (39)-(40)”. In Section 5.8, we have considered completely different function.

C l. 551-552: I agree that the initial conditions influence the dynamics over space/time but in the end the asymptotic states for sufficiently long distance (long times) are the same when the landslide come to a stand-still, as shown in the two plots in figure 10. On other words, the way to go towards  $U_0 = \sqrt{(\alpha/\gamma)}$  is not the same but  $U_0$  is reached at the end of the day. Could you comment on this?

R: Somehow, it has been already explained. Yet, we improve the text by changing (L606-610) “This can be understood, because after a sufficiently long time, the motion is in steady-state. The two panels in Fig. 10

also clearly indicate that the stretching (rate) depends on the initial condition.” to “This can be understood, because after a sufficiently long time, the motion is in steady-state. Nevertheless, the ways the two solutions reach the steady-state are different. The two panels in Fig. 10 also clearly indicate that the stretching (rate) depends on the initial condition.”

C l. 585-586: “This is a fantastic situation.”, again, can be removed!

R: This is so nice. So, we change (L632) “This is a fantastic situation,” to “This is fascinating,”, and hope that the reviewer will agree, otherwise we will remove this phrase.

C l. 630: “This is a seminal understanding” is not needed I think. No need to oversell your work. The reader can appreciate its scientific quality by themselves.

R: We remove this sentence (L676).

C l. 691-692: the last sentence of the paragraph should be removed.

R: We remove this sentence (L737-738).

C: I would suggest to remove the section 7 which repeats many statements already given either in the discussion section or along the main text of the manuscript. The manuscript is very long, difficult to digest. Section 7 is not needed.

R: Mentioned in R 3 above.

### **Technical corrections/editing typos**

C l. 209: replace “has been” by “this will be”.

R: Agree (L232).

C l. 238-239: “... description. Both ...” Please revise, should be one sentence.

R: We put it in one sentence (L263-264).

C l. 318: This section starts by “Second ...”, the first point being in previous sections (l. 312). This needs to be fixed. The two points should be in the same section. Please check and revise.

R: Thank you very much for this suggestion. We fix it (L339-349) by moving the last paragraph before Section 3.2.4 in to the first paragraph in Section 3.2.4.

C l. 387, l. 391 : note sure that “ms-2” is a correct notation; should be replaced by “m s-2” (empty space) or “m.s-2” (dot)?

R: We change it according to the recent publications in eSurf.

C l. 421-422: “So ... identify” can be removed; already said on l. 419 just above.

R: We remove it (L459-460).

C l. 447: replace “Section 4.5” by “the current section” or “this section”.

R: It was a mistake, it should be “Section 4.6 and Section 4.7”. So, we improve accordingly (L485).

C l. 555: replace “has been” by “is”.

R: We change it (L598).

C l. 710: “large” repeated twice; please fix.

R: Will be fixed (L756).



# The Landslide Velocity

Shiva P. Pudasaini<sup>a,b</sup>, Michael Krautblatter<sup>a</sup>

<sup>a</sup> Technical University of Munich, Chair of Landslide Research  
Arcisstrasse 21, D-80333, Munich, Germany

<sup>b</sup> University of Bonn, Institute of Geosciences, Geophysics Section  
Meckenheimer Allee 176, D-53115, Bonn, Germany

E-mail: shiva.pudasaini@tum.de

**Abstract:** Proper knowledge of velocity is required in accurately determining the enormous destructive energy carried by a landslide. We present the first, simple and physics-based general analytical landslide velocity model that simultaneously incorporates the internal deformation (non-linear advection) and externally applied forces, consisting of the net driving force and the viscous resistant. From the physical point of view, the model stands as a novel class of non-linear advective – dissipative system where classical Voellmy and inviscid Burgers' equation are specifications of this general model. We show that the non-linear advection and external forcing fundamentally regulate the state of motion and deformation, which substantially enhances our understanding of the velocity of a coherently deforming landslide. Since analytical solutions provide the fastest, the most cost-effective and the best rigorous answer to the problem, we construct several new and general exact analytical solutions. These solutions cover the wider spectrum of landslide velocity and directly reduce to the mass point motion. New solutions bridge the existing gap between the negligibly deforming and geometrically massively deforming landslides through their internal deformations. This provides a novel, rapid and consistent method for efficient coupling of different types of mass transports. The mechanism of landslide advection, stretching and approaching to the steady-state has been explained. We reveal the fact that shifting, up-lifting and stretching of the velocity field stem from the forcing and non-linear advection. The intrinsic mechanism of our solution describes the fascinating breaking wave and emergence of landslide folding. This happens collectively as the solution system simultaneously introduces downslope propagation of the domain, velocity up-lift and non-linear advection. We disclose the fact that the domain translation and stretching solely depends on the net driving force, and along with advection, the viscous drag fully controls the shock wave generation, wave breaking, folding, and also the velocity magnitude. This demonstrates that landslide dynamics are architected by advection and reigned by the system forcing. The analytically obtained velocities are close to observed values in natural events. These solutions constitute a new foundation of landslide velocity in solving technical problems. This provides the practitioners with the key information in instantly and accurately estimating the impact force that is very important in delineating hazard zones and for the mitigation of landslide hazards.

## 1 Introduction

There are three methods to investigate and solve a scientific problem: laboratory or field data, numerical simulations of governing complex physical-mathematical model equations, or exact analytical solutions of simplified model equations. This is also the case for mass movements including extremely rapid flow-type landslides **processes** such as debris avalanches (Pudasaini and Hutter, 2007). The dynamics of a landslide are primarily controlled by the flow velocity. Estimation of the flow velocity is key for assessment of landslide hazards, design of protective structures, mitigation measures and landuse planning (Tai et al., 2001; Pudasaini and Hutter, 2007; Johannesson et al., 2009; Christen et al., 2010; Dowling and Santi, 2014; Cui et al., 2015; Faug, 2015; Kattel et al., 2018). Thus, a proper understanding of landslide velocity is a crucial requirement for an appropriate modelling of landslide impact force because the associated hazard is directly and strongly related to the landslide velocity (Huggel et al., 2005; Evans et al., 2009; Dietrich and Krautblatter, 2019). **So, the landslide velocity is of great theoretical and practical interest for both scientists and engineers.** However, the mechanical controls of the evolving velocity, runout and impact energy of the landslide have not yet been understood well.

45 Due to the complex terrain, infrequent occurrence, and very high time and cost demands of field measurements,  
46 the available data on landslide dynamics are insufficient. Proper understanding and interpretation of the data  
47 obtained from the field measurements are often challenging because of the very limited nature of the material  
48 properties and the boundary conditions. Additionally, field data are often only available for single locations  
49 and determined as static data after events. Dynamic data are rare (de Haas et al., 2020). So, much of the low  
50 resolution measurements are locally or discretely based on points in time and space (Berger et al., 2011; Schürch  
51 et al., 2011; McCoy et al., 2012; Theule et al., 2015; Dietrich and Krautblatter, 2019). Therefore, laboratory  
52 or field experiments (Iverson et al., 2011; de Haas and van Woerkom, 2016; Lu et al., 2016; Lanzoni et al.,  
53 2017, Li et al., 2017; Pilvar et al., 2019; Baselt et al., 2021) and theoretical modelling (Le and Pitman, 2009;  
54 Pudasaini, 2012; Pudasaini and Mergili, 2019) remain the major source of knowledge in landslide and debris  
55 flow dynamics. Recently, there has been a rapid increase in the comprehensive numerical modelling for mass  
56 transports (McDougall and Hungr, 2005; Medina et al., 2008; Cascini et al., 2014; Cuomo et al., 2016; Frank  
57 et al., 2015; Iverson and Ouyang, 2015; Mergili et al., 2020a,b; Qiao et al., 2019; Liu et al. 2021). However,  
58 to certain degree, numerical simulations are approximations of the physical-mathematical model equations.  
59 **Although numerical simulations may overcome the limitations in the measurements and facilitate for a more**  
60 **complete understanding by investigating much wider aspects of the flow parameters, run-out and deposition,**  
61 **Their usefulness is of such simulations are** often evaluated empirically (Mergili et al., 2020a, 2020b). In contrast,  
62 exact, analytical solutions (Faug et al., 2010; Pudasaini, 2011) can provide better insights into the complex  
63 flow behaviors, mainly the velocity. **, and their consequences.** Moreover, analytical and exact solutions to  
64 non-linear model equations are necessary to elevate the accuracy of numerical solution methods (Chalfen and  
65 Niemiec, 1986; Pudasaini, 2011, 2016; Pudasaini et al., 2018). For this reason, here, we are mainly concerned  
66 in presenting exact analytical solutions for the newly developed general landslide velocity **model** equation.

67 Since Voellmy's pioneering work, several analytical models and their solutions have been presented in the liter-  
68 ature for mass movements including extremely rapid flow-type landslide processes, avalanches and debris flows  
69 (Voellmy, 1955; Salm, 1966; Perla et al., 1980; McClung, 1983). However, on the one hand, all these solutions  
70 are effectively simplified to the mass point or center of mass motion. None of the existing analytical velocity  
71 models consider advection or internal deformation. On the other hand, the parameters involved in these models  
72 only represent restricted physics of the landslide material and motion. Nevertheless, a full analytical model that  
73 includes a wide range of essential physics of the mass movements incorporating important process of internal  
74 deformation and motion is still lacking. This is required for the more accurate description of landslide mo-  
75 tion. **Moreover, recently presented simple analytical solutions for mass transports considered debris avalanches**  
76 **(Pudasaini, 2011), two-phase flows (Ghosh Hajra et al., 2017, 2018), landslide mobility (Pudasaini and Miller,**  
77 **2013; Parez and Aharonov, 2015), fluid flows in debris materials (Pudasaini, 2016), mud flow (Di Cristo et al.,**  
78 **2018), granular front down an incline (Saingier et al., 2016), granular monoclinical wave (Razis et al., 2018) and**  
79 **the submarine debris flows (Rui and Yin, 2019). However, neither a more general landslide model as we have**  
80 **derived here, nor the solution for such a model exists in literature.**

81 **In the recent years, different analytical solutions have been presented for mass transports. These include simple**  
82 **and reduced analytical solutions for avalanches and debris flows (Pudasaini, 2011), two-phase flows (Ghosh**  
83 **Hajra et al., 2017, 2018), landslide and avalanche mobility (Pudasaini and Miller, 2013; Parez and Aharonov,**  
84 **2015), fluid flows in porous and debris materials (Pudasaini, 2016), flow depth profiles for mud flow (Di Cristo**  
85 **et al., 2018), simulating the shape of a granular front down a rough incline (Saingier et al., 2016), the granular**  
86 **monoclinical wave (Razis et al., 2018) and the mobility of submarine debris flows (Rui and Yin, 2019). However,**  
87 **neither a more general landslide model as we have derived here, nor the solution for such a model exists in**  
88 **literature.**

89 **This paper presents a novel non-linear advective - dissipative transport equation with quadratic source term**  
90 **representing the system forcing, containing the physical/mechanical parameters as a function of the state vari-**  
91 **able (the velocity) and their exact analytical solutions describing the landslide motion. The new landslide**  
92 **velocity model and its analytical solutions are more general and constitute the full description for velocities**  
93 **with wide range of applied forces and the internal deformation. Importantly, the newly developed landslide**  
94 **velocity model covers both the classical Voellmy and inviscid Burgers' equations as special cases, unifies and**

95 extends them further, but it also describes fundamentally novel and broad physical phenomena.

96 This paper presents a novel non-linear advective - dissipative transport equation with quadratic source term as  
97 a function of the state variable (the velocity) and their exact analytical solutions describing the landslide motion  
98 down a slope. The source term represents the system forcing, containing the physical/mechanical parameters  
99 and the landslide velocity. Our dynamical velocity equation largely extends the existing landslide models and  
100 range of their validity. The new landslide velocity model and its analytical solutions are more general and  
101 constitute the full description for velocities with wide range of applied forces and the internal deformation  
102 associated with the spatial velocity gradient. In this form, and with respect to the underlying physics and  
103 dynamics, the newly developed landslide velocity model covers both the classical Voellmy and inviscid Burgers  
104 equation as special cases, but it also describes fundamentally novel and broad physical phenomena. Import-  
105 antly, the new model unifies the Voellmy and inviscid Burgers' models and extends them further.

106 It is a challenge to construct exact analytical solutions even for the simplified problems in mass transport  
107 (Pudasaini, 2011, 2016; Di Cristo et al., 2018; Pudasaini et al., 2018). In its full form, this is also true for  
108 the landslide velocity model developed here. In contrast to the existing models, such as Voellmy-type and  
109 Burgers-type, the great complexity in solving the new landslide velocity model equation analytically derives  
110 from the simultaneous presence of the internal deformation (non-linear advection, inertia) and the quadratic  
111 source representing externally applied forces (in terms of velocity, including physical parameters). However,  
112 here, we constructing advance further by constructing However, here, we construct various analytical and exact  
113 solutions to the new general landslide velocity model by applying different advanced mathematical techniques,  
114 including those presented by Nadjafikhah (2009) and Montecinos (2015). We revealed several major novel  
115 dynamical aspects associated with the general landslide velocity model and its solutions. We show that a  
116 number of important physical phenomena are captured by the new solutions. Some special features of the new  
117 solutions are discussed in detail. This includes - landslide propagation and stretching; wave generation and  
118 breaking; and landslide folding. We also observed that different methods consistently produce similar analytical  
119 solutions. This highlights the intrinsic characteristics of the landslide motion described by our new model. As  
120 exact, analytical solutions disclose many new and essential physics, the solutions derived in this paper may  
121 find applications in environmental, engineering and industrial mass transport down slopes and channels.

## 122 2 Basic Balance Equation for Landslide Motion

### 123 2.1 Mass and momentum balance equations

124 A geometrically two-dimensional motion down a slope is considered. Let  $t$  be time,  $(x, z)$  be the coordinates  
125 and  $(g^x, g^z)$  the gravity accelerations along and perpendicular to the slope, respectively. Let,  $h$  and  $u$  be the  
126 flow depth and the mean flow velocity along the slope. Similarly,  $\gamma, \alpha_s, \mu$  be the density ratio between the fluid  
127 and the particles ( $\gamma = \rho_f / \rho_s$ ), volume fraction of the solid particles (coarse and fine solid particles), and the  
128 basal friction coefficient ( $\mu = \tan \delta$ ), where  $\delta$  is the basal friction angle, in the mixture material. Furthermore,  
129  $K$  is the earth pressure coefficient as a function of internal and the basal friction angles, and  $C_{DV}$  is the viscous  
130 drag coefficient.

131 We start with the multi-phase mass flow model (Pudasaini and Mergili, 2019) and include the viscous drag  
132 (Pudasaini and Fischer, 2020). For simplicity, we first assume that the relative velocity between coarse and  
133 fine solid particles ( $u_s, u_{fs}$ ) and the fluid phase ( $u_f$ ) in the landslide (debris) material is negligible, that is,  
134  $u_s \approx u_{fs} \approx u_f =: u$ , and so is the viscous deformation of the fluid. This means, for simplicity, we are considering  
135 an effectively single-phase mixture flow. Then, by summing up the mass and momentum balance equations  
136 (Pudasaini and Mergili, 2019; Pudasaini and Fischer, 2020), we obtain a single mass and momentum balance  
137 equation describing the motion of a landslide as:

$$\frac{\partial h}{\partial t} + \frac{\partial}{\partial x} (hu) = 0, \quad (1)$$

$$\frac{\partial}{\partial t}(hu) + \frac{\partial}{\partial x} \left[ hu^2 + (1 - \gamma) \alpha_s g^z K \frac{h^2}{2} \right] = h \left[ g^x - (1 - \gamma) \alpha_s g^z \mu - g^z \{1 - (1 - \gamma) \alpha_s\} \frac{\partial h}{\partial x} - C_{DV} u^2 \right], \quad (2)$$

139 where  $-(1 - \alpha_s) g^z \partial h / \partial x$  emerges from the hydraulic pressure gradient associated with possible interstitial  
 140 fluids in the landslide. Moreover, the term containing  $K$  on the left hand side, and the other terms on the  
 141 right hand side in the momentum equation (2) represent all the involved forces. The first term in the square  
 142 bracket on the left hand side of (2) describes the advection, while the second term (in the square bracket)  
 143 describes the extent of the local deformation that stems from the hydraulic pressure gradient of the free-  
 144 surface of the landslide. The first, second, third and fourth terms on the right hand side of (2) are the gravity  
 145 acceleration; effective Coulomb friction which includes lubrication  $(1 - \gamma)$ , liquefaction  $(\alpha_s)$  (because, if there is  
 146 no or substantially low amount of solid, the mass is fully liquefied, e.g., lahar flows); **the local deformation due**  
 147 **to the pressure gradient the term associated with buoyancy and the fluid-related hydraulic pressure gradient**;  
 148 and the viscous drag, respectively. Note that the term with  $1 - \gamma$  or  $\gamma$  originates from the buoyancy effect. By  
 149 setting  $\gamma = 0$  and  $\alpha_s = 1$ , we obtain a dry landslide, grain flow or an avalanche motion. For this choice, the  
 150 third term on the right hand side vanishes. However, we keep  $\gamma$  and  $\alpha_s$  also to include possible fluid effects in  
 151 the landslide (mixture).

## 152 2.2 The landslide velocity equation

153 The momentum balance equation (2) can be re-written as:

$$\begin{aligned} & h \left[ \frac{\partial u}{\partial t} + u \frac{\partial u}{\partial x} \right] + u \left[ \frac{\partial h}{\partial t} + \frac{\partial}{\partial x} (hu) \right] \\ & = h \left[ g^x - (1 - \gamma) \alpha_s g^z \mu - g^z \{((1 - \gamma) K + \gamma) \alpha_s + (1 - \alpha_s)\} \frac{\partial h}{\partial x} - C_{DV} u^2 \right]. \end{aligned} \quad (3)$$

154 Note that for  $K = 1$  (which mostly prevails for extensional flows, Pudasaini and Hutter, 2007), the third term  
 155 on the right hand side associated with  $\partial h / \partial x$  simplifies drastically, because  $\{((1 - \gamma) K + \gamma) \alpha_s + (1 - \alpha_s)\}$   
 156 becomes unity. So, the isotropic assumption (i.e.,  $K = 1$ ) loses some important information about the solid  
 157 content and the buoyancy effect in the mixture. Employing the mass balance equation (1), the momentum  
 158 balance equation (3) can be re-written as:

$$\frac{\partial u}{\partial t} + u \frac{\partial u}{\partial x} = g^x - (1 - \gamma) \alpha_s g^z \mu - g^z \{((1 - \gamma) K + \gamma) \alpha_s + (1 - \alpha_s)\} \frac{\partial h}{\partial x} - C_{DV} u^2. \quad (4)$$

159 The gradient  $\partial h / \partial x$  might be approximated, say as  $h_g$ , and still include its effect as a parameter that may be  
 160 estimated. Here, we are mainly interested in developing a simple but more general landslide velocity model  
 161 than the existing ones that can be solved analytically and highlight its essence to enhance our understanding  
 162 of the landslide dynamics.

163 Now, with the notation  $\alpha := g^x - (1 - \gamma) \alpha_s g^z \mu - g^z \{((1 - \gamma) K + \gamma) \alpha_s + (1 - \alpha_s)\} h_g$ , which includes the forces:  
 164 gravity; friction, lubrication and liquefaction; and surface gradient; and  $\beta := C_{DV}$ , which is the viscous drag  
 165 coefficient, (4) becomes a simple model equation:

$$\frac{\partial u}{\partial t} + u \frac{\partial u}{\partial x} = \alpha - \beta u^2, \quad (5)$$

166 where  $\alpha$  and  $\beta$  constitute the net driving and the resisting forces in the system. We call (5) the landslide  
 167 velocity equation.

## 168 2.3 A novel physical–mathematical system

169 Equation (5) constitutes a **genuinely** novel class of non-linear advective - dissipative system and involves dynamic  
 170 interactions between the non-linear advective (or, inertial) term  $u \partial u / \partial x$  and the external forcing (source) term

171  $\alpha - \beta u^2$ . However, in contrast to the viscous Burgers' equation where the dissipation is associated with the  
 172 (viscous) diffusion, here, dissipation stems because of the viscous drag,  $-\beta u^2$ . In the form, (5) is similar to the  
 173 classical shallow water equation. However, from the mechanics and the material composition, it is much wider  
 174 as such model does not exist in the literature. From the physical and mathematical point of view, there are  
 175 two crucial novel aspects associated with model (5). First, it explains the dynamics of deforming landslide and  
 176 thus extends the classical Voellmy model (Voellmy, 1955; Salm, 1966; McClung, 1983; Pudasaini and Hutter,  
 177 2007) due to the broad physics carried by the model parameters,  $\alpha, \beta$ ; and the dynamics described by the new  
 178 term  $u\partial u/\partial x$ . These parameters and the term  $u\partial u/\partial x$  control the landslide deformation and motion. Second,  
 179 it extends the classical non-linear inviscid Burgers' equation by including the non-linear source term,  $\alpha - \beta u^2$ ,  
 180 as a quadratic function of the unknown field variable,  $u$ , taking into account many different forces. associated  
 181 with the system as explained in Section 2.2.

182 From the structure, (5) is a fundamental non-linear partial differential equation, or a non-linear transport  
 183 equation with a source, where the source is the external physical forcing. Such an equation explains the non-  
 184 linear advection with source term that contains the physics of the underlying problem through the parameters  
 185  $\alpha$  and  $\beta$ . The form of this equation is very important as it may describe the dynamical state of many extended  
 186 (as compared to the Voellmy and Burgers models) physical and engineering problems appearing in nature,  
 187 science and technology, including viscous/fluid flow, traffic flow, shock theory, gas dynamics, landslide and  
 188 avalanches (Burgers, 1948; Hopf, 1950; Cole, 1951; Nadjafikhah, 2009; Pudasaini, 2011; Montecinos, 2015).

### 189 3 The Landslide Velocity: Simple Solutions

190 Exact analytical solutions to simplified cases of non-linear debris avalanche model equations provide important  
 191 insight into the full behavior of the system, and are necessary to calibrate numerical simulations. of flow depth  
 192 and velocity profiles. These problem-specific solutions provide important insight into the full behavior of the  
 193 system. Physically meaningful exact solutions explain the true and entire nature of the problem associated with  
 194 the model equation, and thus, are superior over numerical simulations (Pudasaini, 2011; Faug, 2015). Physically  
 195 meaningful exact solutions explain the true and entire nature of the problem associated with the model equation  
 196 (Pudasaini, 2011; Faug, 2015), and thus, should be developed, analyzed and properly understood prior to  
 197 numerical simulations. These exact analytical solutions provide important insights into the full flow behavior  
 198 of the complex system (Pudasaini and Krautblatter, 2021), and are often needed to calibrate and validate the  
 199 numerical solutions (Pudasaini, 2016) as a prerequisite before running numerical simulations based on complex  
 200 numerical schemes. This is very useful to interpret complicated simulations and/or avoid mistakes associated  
 201 with numerical simulations.

202 One of the main purposes of this contribution is to obtain exact analytical velocities for the landslide model (5).  
 203 In the form (5) is simple. So, one may tempt to solve it analytically to explicitly obtain the landslide velocity.  
 204 However, it poses a great mathematical challenge to derive explicit analytical solutions for the landslide velocity,  
 205  $u$ . This is mainly due to the new terms appearing in (5). Below, we construct five different exact analytical  
 206 solutions to the model (5) in explicit form. In order to gain some physical insights into the landslide motion,  
 207 The solutions are compared to each other. Equation (5) can be considered in two different ways: steady-state  
 208 and transient motions, and both without and with (internal) deformation that is described by the term  $u\partial u/\partial x$ .

#### 209 3.1 Steady-state motion

210 For a sufficiently long time and sufficiently long slope, the time independent steady-state motion can be devel-  
 211 oped. Then, (5) reduces to a simplified equation for the landslide velocity down the entire slope:

$$\frac{\partial}{\partial x} \left( \frac{1}{2} u^2 \right) = \alpha - \beta u^2. \quad (6)$$

212 Equivalently, this also represents a mass point velocity along the slope. Classically, (6) is called the center of  
 213 mass velocity of a dry avalanche of flow type (Perla et al., 1980) for  $\gamma = 0, \alpha_s = 1, K = 1$ , and for negligible  
 214 free-surface pressure gradient. This will be discussed in detail at Section 3.2.

### 215 3.1.1 Negligible viscous drag

216 In situations when the Coulomb friction is dominant and the motion is slow, the viscous drag contribution can  
 217 be neglected ( $\beta u^2 \approx 0$ ), e.g., typically the moment after the mass release. Then, the solution to (6) is given by  
 218 **(Solution A)**:

$$u(x; \alpha) = \sqrt{2\alpha(x - x_0) + u_0^2}, \quad (7)$$

219 where  $x$  is the downslope travel distance, and  $u_0$  is the initial velocity at  $x_0$  (or, a boundary condition). Solution  
 220 (7) recovers the landslide velocity obtained by considering the simple energy balance for a mass point in which  
 221 only the gravity and simple dry Coulomb frictional forces are considered (Scheidegger, 1973), both of these  
 222 forces are included in  $\alpha$ . Furthermore, when the slope angle is sufficiently high or close to vertical, (7) also  
 223 represents a near free fall landslide or rockfall velocity. for which  $x$  changes to the vertical height drop.

### 224 3.1.2 Viscous drag included

225 In general, depending on the magnitude of the net driving force (that also includes the Coulomb friction), the  
 226 viscous drag and the magnitude of the velocity, either  $\alpha$  or  $\beta u^2$ , or both can play important role in determining  
 227 the landslide motion. Then, the more general solution for (6) than (7) takes the form **(Solution B)**:

$$u(x; \alpha, \beta) = \sqrt{\frac{\alpha}{\beta} \left[ 1 - \left( 1 - \frac{\beta}{\alpha} u_0^2 \right) \frac{1}{\exp(2\beta(x - x_0))} \right]}, \quad (8)$$

228 where,  $u_0$  is the initial velocity at  $x_0$ . We note that as  $\beta \rightarrow 0$ , the solution (8) approaches (7). The velocity  
 229 given by (8) can be compared to the Voellmy velocity and be used to calculate the speed of an avalanche  
 230 (Voellmy, 1955; McClung, 1983). However, the Voellmy model only considers the reduced physical aspects in  
 231 which  $\alpha$  merely includes the gravitational force due to the slope and the dry Coulomb frictional force. This  
 232 has been will be discussed in more detail in Section 3.2. As in (7), the solution (8) can also represent a near  
 233 free fall landslide (or rockfall) velocity when the slope angle is sufficiently high, or close to vertical, but now,  
 234 it also includes the influence of drag, akin to the sky-jump.

235 It is important to reveal the dynamics of viscous drag in the landslide motion. The major aspect of viscous  
 236 drag is to bring the velocity (motion) to a terminal velocity (steady, uniform) for a sufficiently long travel  
 237 distance. This is achieved by the following relation obtained from (8):

$$\lim_{x \rightarrow \infty} u = \sqrt{\frac{\alpha}{\beta}} =: u_{Tx}, \quad (9)$$

238 where  $u_{Tx}$  stands for the terminal velocity of a deformable mass, or a mass point motion (Voellmy), along the  
 239 slope that is often used to calculate the maximum velocity of an avalanche (Voellmy, 1955; McClung, 1983;  
 240 Pudasaini and Hutter, 2007).

241 In what follows, unless otherwise stated, we use the plausibly chosen physical parameters for rapid mass  
 242 movements: slope angle of about  $50^\circ$ ,  $\gamma = 1100/2700$ ,  $\alpha_s = 0.65$ ,  $\delta = 20^\circ$  (Mergili et al., 2020a, 2020b;  
 243 Pudasaini and Fischer, 2020). This implies the model parameters  $\alpha = 7.0$ ,  $\beta = 0.0019$ . In reality, based  
 244 on the physics of the material and the flow, the numerical values of these model parameters should be set  
 245 appropriately. However, in principle, all of the results presented here are valid for any choice of the parameter  
 246 set  $\{\alpha, \beta\}$ . For simplicity,  $u_0 = 0$  is set at  $x_0 = 0$ , which corresponds to initially zero velocity at the position  
 247 of the mass release. Figure 1 displays the velocity distributions of a landslide down the slope as a function  
 248 of the slope position  $x$ . The magnitudes of the solutions presented here are mainly for reference purpose, ,  
 249 which, however, are subject to scrutiny with laboratory or field data as well as natural events. For the order of  
 250 magnitudes of velocities of natural events, we refer to Section 3.2.2. The velocities in Fig. 1 with and without  
 251 drag, equations (7) and (8), respectively, behave completely differently already after the mass has moved a  
 252 certain distance. For relatively small travel distance, say  $x \leq 50$  m, these two solutions are quite similar as  
 253 the viscous drag is not sufficiently effective yet. The difference increases rapidly as the mass slides further  
 254 down the slope. With the drag, the terminal velocity ( $u_{Tx} = \sqrt{\alpha/\beta} \approx 60.1 \text{ m s}^{-1}$ ) is attained at a sufficient

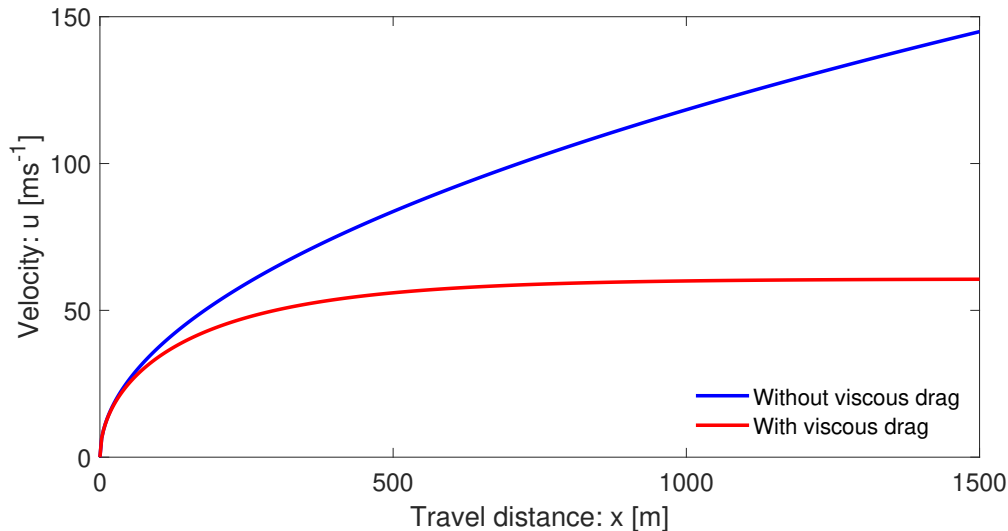

Figure 1: The landslide velocity distributions down the slope as a function of position, for both without and with drag given by (7) and (8), respectively. With drag, the flow attains the terminal velocity  $u_{Tx} \approx 60.1 \text{ m s}^{-1}$  at about  $x = 600 \text{ m}$ , but without drag, the flow velocity increases unboundedly.

255 distance. (about  $x = 600 \text{ m}$ ). But, without drag, the velocity increases forever, which is less likely for a mass  
 256 propagating down a long distance.

257 We note that as  $\beta \rightarrow 0$ , the solution (8) approaches (7). For relatively small travel distance, say  $x \leq 50 \text{ m}$ ,  
 258 these two solutions are quite similar as the viscous drag is not sufficiently effective yet. However, for a long  
 259 travel distance,  $x \gg 50 \text{ m}$ , when the viscous drag is not included, the landslide velocity increases steadily  
 260 without any control, whilst it increases only slowly, and remains almost unchanged for  $x \geq 500 \text{ m}$  when the  
 261 viscous drag effect is involved.

### 262 3.2 A mass point motion

263 Assume no or negligible local deformation (e.g.,  $\partial u / \partial x \approx 0$ ), or a Lagrangian description, both are equivalent  
 264 to the mass point motion. In this situation, only the ordinary differentiation with respect to time is involved,  
 265 and  $\partial u / \partial t$  can be replaced by  $du / dt$ . Then, the model (5) reduces to

$$\frac{du}{dt} = \alpha - \beta u^2. \quad (10)$$

266 Perla et al. (1980) also called (10) the governing equation for the center of mass velocity, however, for a dry  
 267 avalanche of flow type. This is a simple non-linear first order ordinary differential equation. This equation can  
 268 be solved to obtain exact analytical solution for the landslide velocity motion in terms of a tangent hyperbolic  
 269 function (**Solution C**):

$$u(t; \alpha, \beta) = \sqrt{\frac{\alpha}{\beta}} \tanh \left[ \sqrt{\alpha\beta} (t - t_0) + \tanh^{-1} \left( \sqrt{\frac{\beta}{\alpha}} u_0 \right) \right], \quad (11)$$

270 where,  $u_0 = u(t_0)$  is the initial velocity at time  $t = t_0$ . Equation (11) provides the time evolution of the velocity  
 271 of the coherent (without fragmentation and substantial deformation) sliding mass until the time it fragments  
 272 and/or moves like an avalanche. This transition time is denoted by  $t_A$  (or,  $t_F$ ) indicating fragmentation, or the  
 273 inception of the avalanche motion due to fragmentation or large deformation. So, (11) is valid for  $t < t_A$ . For  
 274  $t > t_A$ , After that, we must use the full dynamical mass flow model (Pudasaini, 2012; Pudasaini and Mergili,  
 275 2019), or the equations (1) and (2). For more detail on it, see Section 6.1. For sufficiently long time, or in the

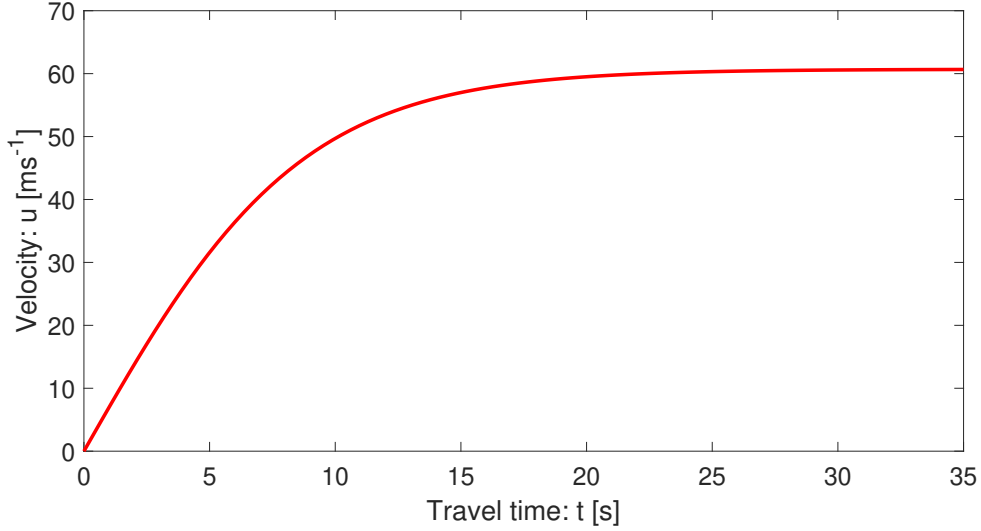

Figure 2: Time evolution of the landslide velocity down the slope with drag given by (11). The motion attains the terminal velocity at about  $t = 15$  s.

276 **limit as** the viscous force brings the motion to a non-accelerating state (steady, uniform). Then, from (11) we  
 277 obtain:

$$\lim_{t \rightarrow \infty} u = \sqrt{\frac{\alpha}{\beta}} =: u_{Tt}, \quad (12)$$

278 where  $u_{Tt}$  stands for the terminal velocity of the motion of a point mass.

279 **The landslide position:** Since  $u(t) = dx/dt$ , (11) can be integrated to obtain the landslide position as a  
 280 function of time:

$$x(t; \alpha, \beta) = x_0 + \frac{1}{\beta} \ln \left[ \cosh \left\{ \sqrt{\alpha\beta} (t - t_0) - \tanh^{-1} \left( \sqrt{\frac{\beta}{\alpha}} u_0 \right) \right\} \right] - \frac{1}{\beta} \ln \left[ \cosh \left\{ -\tanh^{-1} \left( \sqrt{\frac{\beta}{\alpha}} u_0 \right) \right\} \right], \quad (13)$$

281 where  $x_0$  corresponds to the position at the initial time  $t_0$ . Figure 2 displays the velocity profile of a landslide  
 282 **down the slope** as a function of the time as given by (11). **For simplicity,  $u_0 = 0$  is set as initial condition at**  
 283  **$t_0 = 0$ , which corresponds to initially zero velocity at the time of the landslide trigger.** The terminal velocity  
 284 ( $u_{Tt} = \sqrt{\alpha/\beta}$ ) is attained at a sufficiently long time ( $\sim 15$  s). **We note that,** In the structure, the model (10)  
 285 and its solution (11) exists in literature (Pudasaini and Hutter, 2007) and is classically called Voellmy's mass  
 286 point model (Voellmy, 1955), or Voellmy-Salm model (Salm, 1966) that disregards the position dependency of  
 287 the landslide velocity (Gruber, 1989). But,  $(1 - \gamma)$ ,  $\alpha_s$ , and the term associated with  $h_g$  are new contributions  
 288 and were not included in the Voellmy model, and  $K = 1$  therein, while in our consideration  $\alpha$ ,  $K$  can be chosen  
 289 appropriately. Thus, the Voellmy model corresponds to the substantially reduced form of  $\alpha$ , with  $\alpha = g^x - g^z \mu$ .

### 290 3.2.1 The dynamics controlled by the physical and mechanical parameters

291 Solutions (8) and (11) are constructed independently, one for the velocity of a deformable mass as a function  
 292 of travel distance, or the velocity of the center of mass of the landslide down the slope, and the other for the  
 293 velocity of a mass point motion as a function of time. Unquestionable, they have their own dynamics. However,  
 294 for sufficiently long distance and sufficiently long time, or in the space and time limits, these solutions coincide  
 295 and we obtain a unique relationship:

$$u_{Tx} = u_{Tt} = \sqrt{\frac{\alpha}{\beta}}. \quad (14)$$

296 So, after a sufficiently long distance or a sufficiently long time, the forces associated with  $\alpha$  and  $\beta$  always  
 297 maintain a balance resulting in the terminal velocity of the system,  $\sqrt{\alpha/\beta}$ . This is **remarkable. a fantastic**



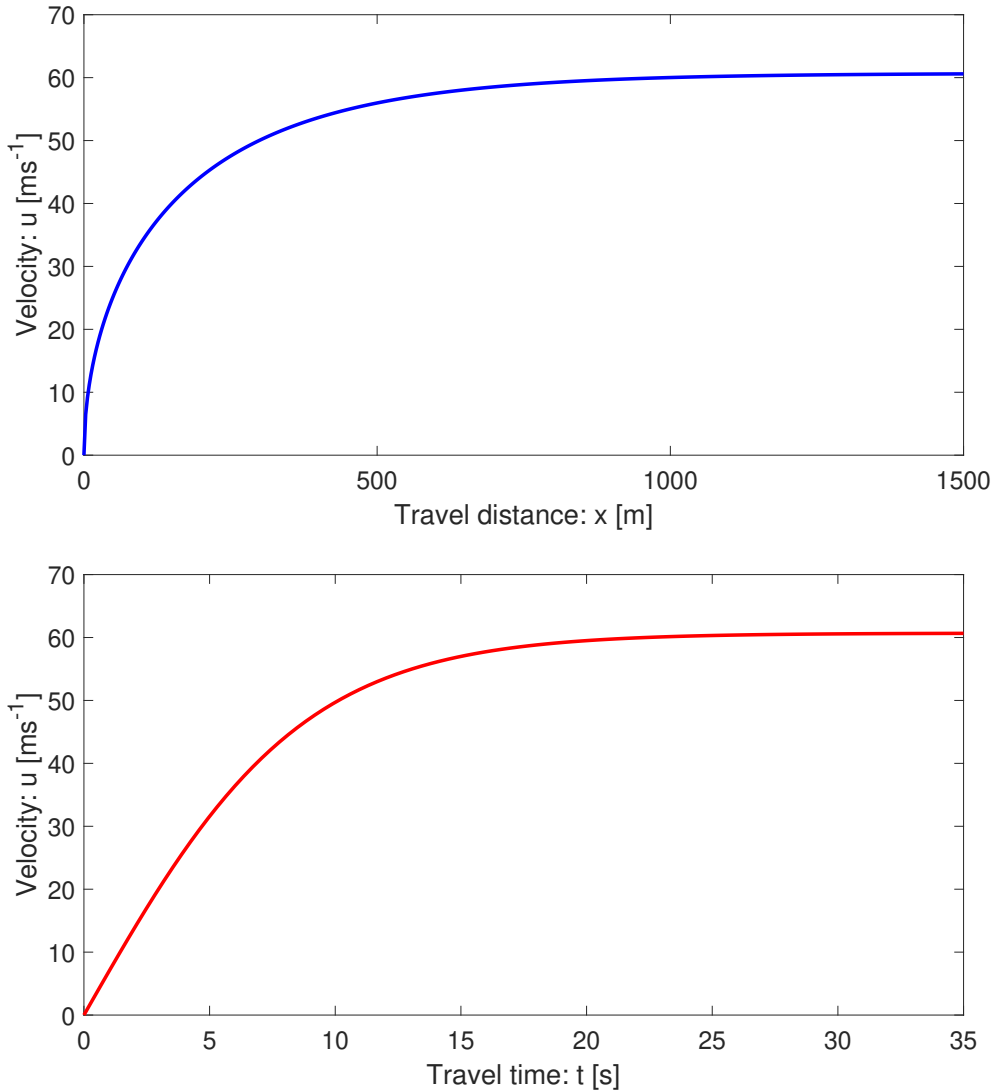

Figure 3: Evolution of the landslide velocity down the slope as a function of space (top) given by (8), and time (bottom) given by (11), respectively, both with drag. The flow attains the terminal velocity at about  $x = 600$  m and  $t = 15$  s.

298 **situation.** Intuitively this is clear because, one could simply imagine that sufficiently long distance could  
 299 somehow be perceived as sufficiently long time, and for these limiting (but fundamentally different) situations,  
 300 there exists a single representative velocity that characterizes the dynamics. This has exactly happened, and  
 301 is an advanced understanding. This has been shown in Fig. 1 and Fig. 2 which implicitly indicates the  
 302 equivalence between (8) and (11). In fact, this can be proven, because, for the mass point or the center of mass  
 303 motion,

$$\frac{du}{dt} = \frac{du}{dx} \frac{dx}{dt} = u \frac{du}{dx} = \frac{du}{dx} \left( \frac{1}{2} u^2 \right) = \frac{\partial u}{\partial x} \left( \frac{1}{2} u^2 \right), \quad (15)$$

304 is satisfied.

305 In Fig. 1 and Fig. 2, both velocities (with drag) have the same limiting values. The flow attains the terminal  
 306 velocity at about  $x = 600$  m and  $t = 15$  s, but their early behaviours are quite different. In space, the velocity  
 307 shows hyper increase after the incipient motion. However, the time evolution of velocity is slow (almost linear)  
 308 at first, then fast, and finally attains the steady-state,  $\sqrt{\alpha/\beta} = 60.1$  m s<sup>-1</sup>, the common value for both the  
 309 solutions.

### 3.2.2 The velocity magnitudes

311 **Importantly, for a uniformly inclined slope, the** Landslide can reach its maximum or the terminal velocity after  
312 a relatively short travel distance, or time with value on the order of  $50 \text{ m s}^{-1}$ . **These are often observed**  
313 **scenarios, e.g., for snow or rock-ice avalanches** (Schaerer, 1975; Gubler, 1989; Christen et al., 2002; Havens et  
314 al., 2014). The velocity magnitudes presented above are quite reasonable for fast to rapid landslides and debris  
315 avalanches **and correspond to several natural events** (Highland and Bobrowsky, 2008). The front of the 2017  
316 Piz-Chengalo Bondo landslide (**Switzerland**) moved with more than  $25 \text{ m s}^{-1}$  already after 20 s of the rock  
317 avalanche release (Mergili et al., 2020b), and later it moved at about  $50 \text{ m s}^{-1}$  (Walter et al., 2020). The 1970  
318 rock-ice avalanche event in Nevado Huascarán (**Peru**) reached mean velocity of  $50 - 85 \text{ m s}^{-1}$  at about 20 s,  
319 but the maximum velocity in the initial stage of the movement reached as high as  $125 \text{ m s}^{-1}$  (Erismann and  
320 Abele, 2001; Evans et al., 2009; Mergili et al. 2018). The 2002 Kolka glacier rock-ice avalanche **in the Russian**  
321 **Kaucasus** accelerated with the velocity of about  $60 - 80 \text{ m s}^{-1}$ , but also attained the velocity as high as  $100 \text{ m}$   
322  $\text{s}^{-1}$ , mainly after the incipient motion (Huggel et al., 2005; Evans et al., 2009).

### 3.2.3 Accelerating and decelerating motions

324 Depending on the magnitudes of the involved forces, and whether the initial mass was **released or** triggered  
325 with a small (including zero) velocity or with high velocity, **e.g., by a strong seismic shacking, e.g., by a strong**  
326 **seismic shacking, or when a high potential energy is available and is converted quasi-instantaneously into kinetic**  
327 **energy (the situation prevails when the vertical height drop of the detachment area is huge and the slope angle**  
328 **of the terrain is high)**, (11) provides fundamentally different but physically meaningful velocity profiles. Both  
329 solutions asymptotically approach  $\sqrt{\alpha/\beta}$ , the lead magnitude in (11). For notational convenience, we write  
330  $S_n(\alpha, \beta) = \sqrt{\alpha/\beta}$ , which has the dimension of velocity,  $\sqrt{\alpha/\beta}$  and is called the separation number (velocity) as  
331 it separates accelerating and decelerating regimes. **Description for deceleration is given below.** Furthermore,  $S_n$   
332 includes all the involved forces in the system and is the function of the ratio between the mechanically known  
333 forces: gravity, friction, lubrication and surface gradient; and the viscous drag force **coefficient**. Thus,  $S_n$  fully  
334 governs the ultimate state of the landslide motion. For initial velocity less than  $S_n$ , i.e.,  $u_0 < S_n$ , the landslide  
335 velocity increases rapidly just after its release, then ultimately (after a sufficiently long time) it approaches  
336 asymptotically to the steady state,  $S_n$  (Fig. 2). This is the accelerating motion. On the other hand, if the initial  
337 velocity was higher than  $S_n$ , i.e.,  $u_0 > S_n$ , the landslide velocity would decrease rapidly just after its release,  
338 then it ultimately would asymptotically approaches to  $S_n$ . This is the decelerating motion (not shown here).  
339 **We have now two possibilities. First, we can describe  $u(t; \alpha, \beta)$  as a function of time with  $\alpha, \beta$  as parameters.**  
340 **This corresponds to the velocity profile of the particular landslide characterized by the geometrical, physical**  
341 **and mechanical parameters  $\alpha$  and  $\beta$  as time evolves. This has been shown in Fig. 2 for  $u_0 < S_n$ . A similar**  
342 **solution can be displayed for  $u_0 > S_n$  for which the velocity would decrease and asymptotically approach to**  
343  **$S_n$ .**

### 3.2.4 Velocity described by the space of physical parameters

345 **We have now two possibilities. First, we can describe  $u(t; \alpha, \beta)$  as a function of time with  $\alpha, \beta$  as parameters.**  
346 **This corresponds to the velocity profile of the particular landslide characterized by the geometrical, physical**  
347 **and mechanical parameters  $\alpha$  and  $\beta$  as time evolves. This has been shown in Fig. 2. for  $u_0 < S_n$ . A similar**  
348 **solution can be displayed for  $u_0 > S_n$  for which the velocity would decrease and asymptotically approach to**  
349  **$S_n$ .** Second, we can investigate the control of the physical parameters on the landslide motion for a given  
350 time. This is achieved by plotting  $u(\alpha, \beta; t)$  as a function of  $\alpha$  and  $\beta$ , and considering time as a parameter.  
351 Figure 4 shows the influence of **the parameters**  $\alpha$  and  $\beta$  on the evolution of the velocity for a landslide motion  
352 for a typical time  $t = 35 \text{ s}$ . The parameters  $\alpha$  and  $\beta$  enhance or control the landslide velocity completely  
353 differently. For a set of parameters  $\{\alpha, \beta\}$ , we can now provide an estimate of the landslide velocity. As  
354 mentioned earlier, the landslide velocity as high as  $125 \text{ m s}^{-1}$  have been reported in the literature with their  
355 mean and common values in the range of  $60 - 80 \text{ m s}^{-1}$  for rapid motions. This way, we can explicitly study  
356 the influence of the physical parameters on the dynamics of the velocity field and also determine their range  
357 of plausible values. This answers the question on how would the two similar looking, but physically differently

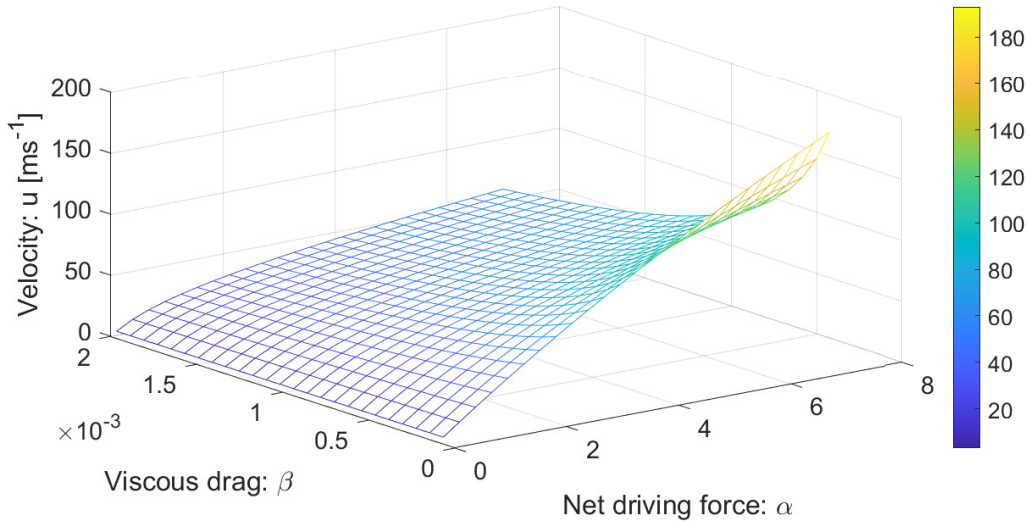

Figure 4: The influence of the model parameters  $\alpha$  and  $\beta$  on the landslide velocity. Colorbar shows velocity distributions in  $\text{m s}^{-1}$ .

358 characterized landslides move. They may behave completely differently.

### 359 3.2.5 A model for viscous drag

360 There exist explicit models for the interfacial drags between the particles and the fluid (Pudasaini, 2020) in  
 361 the multiphase mixture flow (Pudasaini and Mergili, 2019). However, there exists no clear representation  
 362 of the viscous drag coefficient for landslide which is the drag between the landslide and the environment.  
 363 Often in applications, the drag coefficient ( $\beta = C_{DV}$ ) is prescribed and is later calibrated with the numerical  
 364 simulations to fit with the observation or data (Kattel et al., 2016; Mergili et al., 2020a, 2020b). Here, we  
 365 explore an opportunity to investigate on how the characteristic landslide velocity (14) offers a **unique** possibility  
 366 to define the drag coefficient. Equation (14) can be written as

$$\beta = \frac{\alpha}{u_{max}^2}, \quad (16)$$

367 where,  $u_{max}$  represents the maximum possible velocity during the motion as obtained from the (long-time)  
 368 steady-state behaviour of the landslide. Equation (16) provides a clear and novel definition (representation) of  
 369 the viscous drag in mass movement (flow) as the ratio of the applied forces to the square of the steady-state  
 370 (or a maximum possible) velocity the system can attain. With the representative mass  $m$ , (16) can be written  
 371 as

$$\beta = \frac{\frac{1}{2}m\alpha}{\frac{1}{2}mu_{max}^2}. \quad (17)$$

372 Equivalently,  $\beta$  is the ratio between the one half of the “system-force”,  $\frac{1}{2}m\alpha$  (the driving force), and the  
 373 (maximum) kinetic energy,  $\frac{1}{2}mu_{max}^2$ , of the landslide. With the knowledge of the relevant maximum kinetic  
 374 energy of the landslide (Körner, 1980), the model (17) for the drag can be closed.

### 375 3.2.6 Landslide motion down the entire slope

376 Furthermore, we note that following the classical method by Voellmy (Voellmy, 1955) and extensions by Salm  
 377 (1966) and McClung (1983), the velocity models (8) and (11) can be used for multiple slope segments to  
 378 describe the accelerating and decelerating motions as well as the landslide run-out. These are also called the  
 379 release, track and run-out segments of the landslide, or avalanche (Gubler, 1989). However, for the gentle slope,  
 380 or the run-out, the frictional force may dominate gravity. In this situation, the sign of  $\alpha$  in (5) changes. Then,

381 all the solutions derived above must be thoroughly re-visited with the initial condition for velocity being that  
 382 obtained from the lower end of the upstream segment. This way, we can apply the model (5) to analytically  
 383 describe the landslide motion for the entire slope, from its release, through the track and the run-out, as well  
 384 as to calculate the total travel distance. These methods can also be applied to the general solutions derived in  
 385 Section 4 and Section 5.

386 We mention that, for two-dimensional cycloidal or parabolic tracks, Gauer (2018) presented analytical velocities  
 387 for the mass block motions with simple dry Coulomb or constant energy dissipation along the track. For such  
 388 idealized path geometries he found an important relationship, that the maximum front-velocity,  $U_{max}$ , of major  
 389 snow avalanches scales with the total drop height of the track,  $H_{sc}$ :  $U_{max} \sim \sqrt{gH_{sc}/2}$ , where  $g$  is the gravity  
 390 constant. Within its scope, this simple relationship may be applied to estimate the maximum velocity in (17).

## 391 4 The Landslide Velocity: General Solution - I

392 For shallow motion the velocity may change locally, but the change in the landslide geometry may be param-  
 393 eterized. In such a situation, the force produced by the free-surface pressure gradient can be estimated. A  
 394 particular situation is the moving slab for which  $h_g = 0$ , otherwise  $h_g \neq 0$ . This justifies the physical signifi-  
 395 cance of (5).

396 The Lagrangian description of a landslide motion is easier. However, the Eulerian description provides a bet-  
 397 ter and more detailed picture of the landslide motion as it also includes the local deformation due to the  
 398 velocity gradient. So, here we consider the model equation (5). Without reduction, conceptually, this can  
 399 be viewed as an inviscid, non-homogeneous, dissipative Burgers' equation with a quadratic source of system  
 400 forces, and includes both the time and space dependencies of  $u$ . Exact analytical solutions for (5) can still  
 401 be constructed, however, in more sophisticated forms, and is very demanding mathematically. First, For the  
 402 notational convenience, we re-write (5) as:

$$\frac{\partial u}{\partial t} + g(u) \frac{\partial u}{\partial x} = f(u), \quad (18)$$

403 where,  $g(u) = u$ , and  $f(u) = \alpha - \beta u^2$  correspond to our model (5). Here,  $g$  and  $f$  are sufficiently smooth  
 404 functions of  $u$ , the landslide velocity. Next, We construct exact analytical solution to the generic model (18).  
 405 For this, first we state the following theorem from Nadjafikhah (2009).

406 **Theorem 4.1:** *Let  $f$  and  $g$  be invertible real valued functions of real variables,  $f$  is everywhere away from zero,*  
 407  *$\phi(u) = \int \frac{1}{f(u)} du$  is invertible, and  $l(u) = \int (g(\phi^{-1}(u))) du$ . Then,  $x = l(\phi(u)) + F[t - \phi(u)]$  is the solution*  
 408 *of (18), where  $F$  is an arbitrary real valued smooth function of  $t - \phi(u)$ .*

409 To our problem (5), we have constructed the exact analytical solution (below in Section 4.1), (in Section 4.1),  
 410 and reads as (**Solution D**):

$$x = \frac{1}{\beta} \ln \left[ \cosh \left( \sqrt{\alpha\beta} \phi(u) \right) \right] + F[t - \phi(u)]; \quad \phi(u) = \frac{1}{2} \frac{1}{\sqrt{\alpha\beta}} \ln \left[ \frac{\sqrt{\alpha/\beta} + u}{\sqrt{\alpha/\beta} - u} \right], \quad (19)$$

411 describing the temporal and spatial evolution of the landslide velocity. It is important to note, that in (19),  
 412 the major role is played by the function  $\phi$  that contains all the forces of the system. Furthermore, the function  
 413  $F$  includes the time-dependency of the solution. The amazing fact with the solution (19) is that any smooth  
 414 function  $F$  with its argument  $[t - \phi(u)]$  is a valid solution of the model equation. This means that, different  
 415 landslides may be described by different  $F$  functions. Alternatively, a class of landslides might be represented  
 416 by a particular function  $F$ . This is substantial.

### 417 4.1 Derivation of the solution to the general model equation

418 Here, we present the detailed derivation of the analytical solution (19) to the landslide velocity equation (5).  
 419 We derive the functions  $\phi$ ,  $\phi^{-1}$ ,  $l$  and  $l \circ \phi$  that are involved in constructing the analytical solution in Theorem

420 4.1. **for our model (5)**. The first function  $\phi$  is given by

$$\phi(u) = \int \frac{1}{f(u)} du = \int \frac{1}{\alpha - \beta u^2} du = \frac{1}{2\sqrt{\alpha\beta}} \ln \left[ \frac{\sqrt{\alpha/\beta} + u}{\sqrt{\alpha/\beta} - u} \right]. \quad (20)$$

421 With the substitution,  $\tau = \phi(u)$  (which implies  $u = \phi^{-1}(\tau)$ ), we obtain,

$$\phi^{-1}(\tau) = \sqrt{\frac{\alpha}{\beta}} \left[ \frac{\exp(2\sqrt{\alpha\beta}\tau) - 1}{\exp(2\sqrt{\alpha\beta}\tau) + 1} \right] = \sqrt{\frac{\alpha}{\beta}} \tanh(\sqrt{\alpha\beta}\tau). \quad (21)$$

422 So, now the second function  $\phi^{-1}$  can be written in terms of  $u$ . However, we must be consistent with the physical  
 423 dimensions of the involved variables and functions. The quantities  $u$ ,  $\sqrt{\alpha\beta}$ ,  $\sqrt{\alpha/\beta}$  and  $\tau$  have dimensions of m  
 424  $s^{-1}$ ,  $s^{-1}$ ,  $m s^{-1}$  and s. Thus, for the dimensional consistency, the following mapping introduces a new multiplier  
 425  $\lambda$  with the dimension of  $1/m s^{-2}$ . Therefore, we have

$$\phi^{-1}(u) = \sqrt{\frac{\alpha}{\beta}} \tanh(\sqrt{\lambda\alpha\beta}u). \quad (22)$$

426 With this, the third function  $l(u)$  yields:

$$l(u) = \int g(\phi^{-1}(u)) du = \int \phi^{-1}(u) du = \sqrt{\frac{\alpha}{\beta}} \int \tanh(\sqrt{\lambda\alpha\beta}u) du = \frac{1}{\lambda\beta} \ln [\cosh(\lambda\sqrt{\alpha\beta}u)]. \quad (23)$$

427 The fourth function  $l(\phi(u)) = (l\phi)(u)$  is instantly achieved:

$$l(\phi(u)) = \left(\frac{\chi}{\lambda}\right) \frac{1}{\beta} \ln [\cosh(\xi\lambda)\sqrt{\alpha\beta}\phi(u)], \quad (24)$$

428 where, as before, the multipliers  $\chi$  and  $\xi$  emerge due to the transformation and for the dimensional consistency,  
 429 they have the dimensions of  $1/(m s^{-2})$  and  $m s^{-2}$ , respectively. The nice thing about the groupings  $(\chi/\lambda)$  and  
 430  $(\xi\lambda)$  is that they are now dimensionless and unity.

431 Utilizing these functions in Theorem 4.1, we finally constructed the exact analytical solution (19). **to the model**  
 432 **equation (5) describing the temporal and spatial evolution of the landslide velocity.**

## 433 4.2 Recovering the mass point motion

434 The amazing fact is that the newly constructed general analytical solution (19) is strong and includes both  
 435 the mass point solutions for velocity (11) and the position (13). **Below we prove, that for a special choice of**  
 436 **the function  $F$ , (19) directly implies both (11) and (13).** For this, consider a particular form of  $F$  such that  
 437  $F(0) \equiv 0$ , which is called a vacuum solution. **First,  $F(0) \equiv 0$  which implies that  $t = \phi(u)$ .** Then, with the  
 438 functional relation of  $\phi(u)$  in (19), **and after some simple algebraic operations,** we obtain:

$$u = \sqrt{\frac{\alpha}{\beta}} \tanh[\sqrt{\alpha\beta}t]. \quad (25)$$

439 Up to the constant of integration parameters (with  $u_0 = 0$  at  $t_0 = 0$ ), (25) is (11). So, the first assertion is  
 440 proved. Second, using  $F(0) \equiv 0$  and  $\phi(u) = t$  in (19), immediately yields

$$x = \frac{1}{\beta} \ln [\cosh(\sqrt{\alpha\beta}t)]. \quad (26)$$

441 Again, up to the constant of integration parameters (with  $x_0 = 0$ , and  $u_0 = 0$  at  $t_0 = 0$ ), (26) is (13). This  
 442 proves the second assertion.

443 Moreover, we mention that (25) and (26) can also be obtained formally. This proves that the conditions used  
 444 on  $F$  are legitimate. To see this, we differentiate (19) with respect to  $t$  to yield

$$u = \frac{dx}{dt} = \sqrt{\frac{\alpha}{\beta}} \tanh[\sqrt{\alpha\beta}\phi(u)] \frac{d\phi}{dt} + F'[t - \phi(u)] \left(1 - \frac{d\phi}{dt}\right). \quad (27)$$

445 But, differentiating  $\phi$  in (19) with respect to  $t$  and employing (10), we obtain  $d\phi/dt = 1$ , or  $\phi = t$ . Now, by  
 446 substituting these in (27) and (19) we respectively recover (25) and (26).

447 However, we note that  $F$  in (19) is a general function. So, (19) provides a wide spectrum of analytical solutions  
 448 for the landslide velocity as a function of time and space, much wider than (11) and (13).

### 449 4.3 Some particular exact solutions

450 Here, we present some interesting particular exact solutions of (19) in the limit as  $\beta \rightarrow 0$ . For this purpose,  
 451 first we consider (5) with  $\beta \rightarrow 0$ , and introduce the new variables  $\tilde{t} = \alpha t$ ,  $\tilde{x} = \alpha x$ . Then, (5) can be written as:

$$\frac{\partial u}{\partial \tilde{t}} + u \frac{\partial u}{\partial \tilde{x}} = 1. \quad (28)$$

452 **Note that each term in this equation is dimensionless.** We apply Theorem 4.1 and the underlying techniques to  
 453 (28). So,  $f(u) = 1$  implies  $\phi(u) = u$ ,  $l(u) = u^2/2$ , and  $l(\phi(u)) = u^2/2$ . Following the procedure as for (19), we  
 454 obtain the solution to (28) as:  $\tilde{x} = \frac{u^2}{2} + F(\tilde{t} - u)$ . However, the direct application of  $\phi(u) = u$  in (19) leads  
 455 to the solution (that is more complex in its form):  $\tilde{x} = \frac{1}{\beta} \ln [\cosh(\sqrt{\beta}u)] + F(\tilde{t} - u)$ . Then, in the limit, we  
 456 must have:

$$\lim_{\beta \rightarrow 0} \frac{1}{\beta} \ln [\cosh(\sqrt{\beta}u)] = \frac{u^2}{2}. \quad (29)$$

457 This is an important mathematical identity we obtained as a direct consequence of Theorem 4.1 and (19).  
 458 Furthermore, the identity (29) when applied to (26) implies:

$$\lim_{\beta \rightarrow 0} x = \lim_{\beta \rightarrow 0} \frac{1}{\beta} \ln [\cosh(\sqrt{\alpha\beta}t)] = \lim_{\beta \rightarrow 0} \frac{1}{\beta} \ln [\cosh\{\sqrt{\beta}(\sqrt{\alpha}t)\}] = \frac{1}{2}\alpha t^2. \quad (30)$$

459 Thus,  $x = \frac{1}{2}\alpha t^2$ , which is the travel distance in time when the viscous drag is absent. **So, (29) is a physically**  
 460 **important identity.**

461 Moreover, with the definition of  $\tilde{x}$ , for the particular choice of  $F \equiv 0$ ,  $\tilde{x} = \frac{u^2}{2} + F(\tilde{t} - u)$  results in  $u(x; \alpha) =$   
 462  $\sqrt{2\alpha x}$ , which is **the solution given in (7)**. Furthermore, with the choice of  $\tilde{x} = 0$ , and  $F = \tilde{t} - u$ , we obtain  
 463  $u = 1 - \sqrt{1 - 2\alpha t}$ , which for small  $t$ , can be approximated as  $u \approx \alpha t$ . But, in the limit as  $\beta \rightarrow 0$ , (11) brings  
 464 about  $u = \alpha t$ , which however, is valid for all  $t$  values. Thus, (19) generalizes both solutions (7) and (11) in  
 465 numerous ways.

### 466 4.4 Reduction to the classical Burgers' equation

467 Interestingly, by directly taking limit as  $\beta \rightarrow 0$ , from (19) we obtain

$$x = \frac{u^2}{2\alpha} + F\left(t - \frac{u}{\alpha}\right), \quad (31)$$

468 which can be written as

$$u^2 + 2\alpha F\left(t - \frac{u}{\alpha}\right) - 2\alpha x = 0. \quad (32)$$

469 Importantly, for any choice of the function  $F$ , (32) satisfies

$$\frac{\partial u}{\partial t} + u \frac{\partial u}{\partial x} = \alpha, \quad (33)$$

470 which reduces to the classical inviscid Burgers' equation when  $\alpha \rightarrow 0$ .

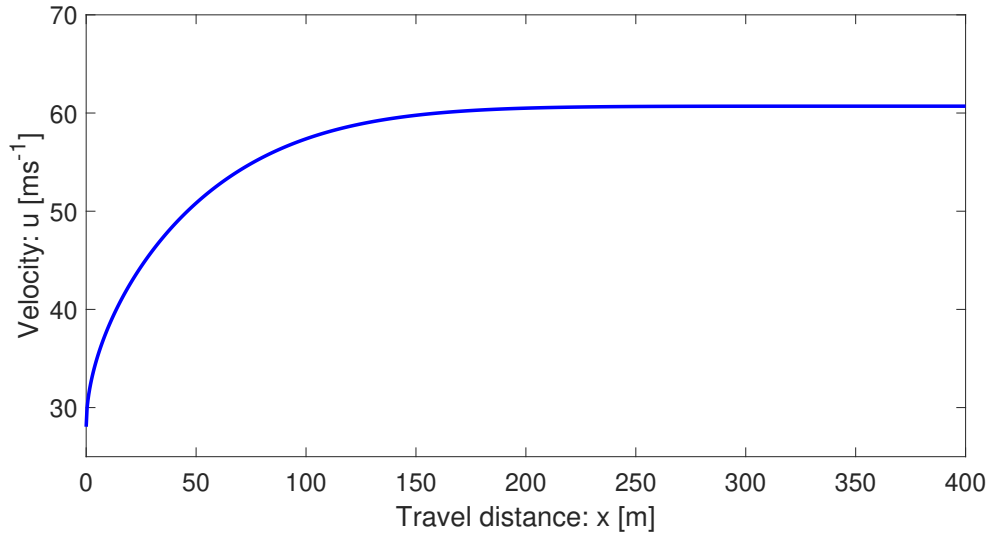

Figure 5: Velocity distribution given by (34).

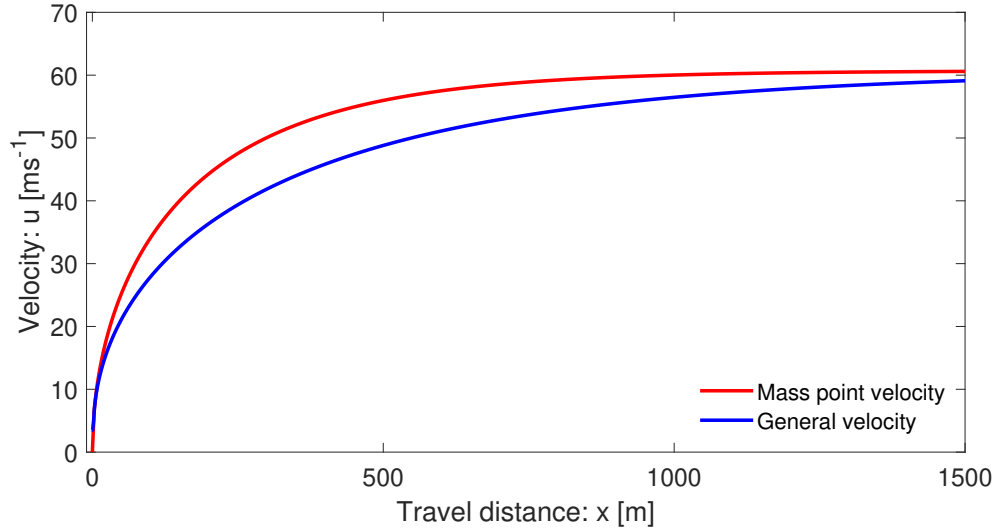

Figure 6: Evolution of the velocity field along the slope as given by (35) for general velocity against the mass point (or, center of mass) velocity corresponding to (8).

#### 471 4.5 Some explicit expressions for $u$ in (19)

472 For a properly selected function  $F$ , (19) can be solved exactly for  $u$ . For example, consider a constant  $F$ ,  
 473  $F = \Lambda$ . Then, an explicit exact solution is obtained as:

$$u = \sqrt{\frac{\alpha}{\beta}} \tanh \left[ \frac{1}{2} \exp \left\{ 2 \cosh^{-1} \left( \exp(\beta(x - \Lambda)) \right) \right\} \right]. \quad (34)$$

474 Figure 5 shows the velocity distribution given by (34) with  $u \approx 28 \text{ m s}^{-1}$  at  $x = 0$  and  $\Lambda = 0$ , which reaches  
 475 the steady-state at about  $x = 150 \text{ m}$ , much faster than the solution given by (8) in Fig. 1.

476 However, other more general solutions could be found by considering different  $F$  functions in (19). **One such**  
 477 **case is presented here.** For example with **the choice**  $F = \frac{1}{\beta} \ln \left[ c \cosh \left\{ \sqrt{\alpha\beta}(t - \phi(u)) \right\} \right]$ , where  $c$  is a constant,

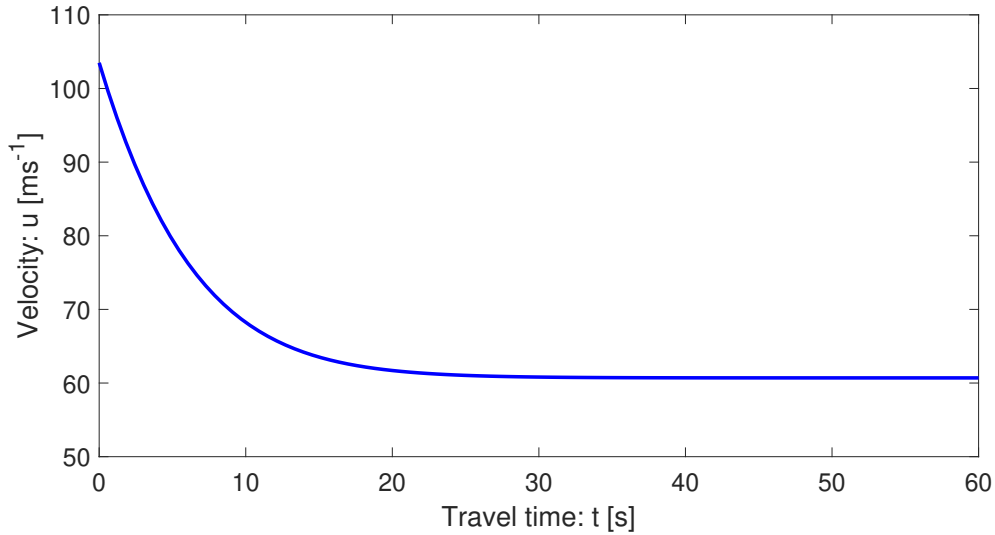

Figure 7: Time evolution of the velocity field as given by (35).

(19) can be solved explicitly for  $u$  in terms of  $x$  and  $t$ : , which, after lengthy algebra, takes the form:

$$u = \sqrt{\frac{\alpha}{\beta}} \tanh \left[ \frac{1}{2} \left\{ \cosh^{-1} \left( \frac{2}{c} \exp(\beta x) - \cosh(\sqrt{\alpha\beta} t) \right) + \sqrt{\alpha\beta} t \right\} \right]. \quad (35)$$

The velocity profile along the slope as given by (35) is presented in Fig. 6 for  $t = 1 \text{ m s}^{-1}$  and  $c = 1$ . This solution is quite different to that in Fig. 1 produced by (8). which does not consider the local time variation of the velocity. From the dynamical perspective, the solution (35) is better than the mass point solution (8). The important observation is that the solution given by (8) substantially overestimates the legitimate more general solution (35) that includes both the local time and space variation of the velocity field. The lower velocity with (35) corresponds to the energy consumption due to the deformation associated with the velocity gradient  $\partial u / \partial x$  in (5). This will be discussed in more detail in Section 4.5 and Section 4.6. Section 4.6 and Section 4.7.

Furthermore, Fig. 7 presents the time evolution of the velocity field given by (35) for  $x = 25 \text{ m}$ ,  $c = -2$ . This corresponds to the decelerating flow motion down the slope that starts with a very high velocity and finally asymptotically approaches to the steady-state velocity. of the system. Similar situation has also been discussed at Section 3.2.3, but for a mass point motion.

#### 4.6 Description of the general velocity

A crucial aspect of a complex analytical solution is its proper interpretation. The general solution (19) can be plotted as a function of  $x$  and  $t$ . the travel distance  $x$  and the travel time  $t$ . For the purpose of comparing the results with those derived previously, we select  $F$  as:  $F = [F_k(t - \phi(u))]^{p_w} + F_c$  with parameter values,  $F_k = 5000$ ,  $F_c = -500$ ,  $p_w = 1/2$ . Furthermore,  $x$  is a parameter while plotting the velocity as a function of  $t$ . time. In these situations, in order to obtain a physically plausible solution, , the space parameter  $x_0 = -600$  is selected. To match the origin of the mass point solution, in plotting, the time has been shifted by -2. Figure 8 depicts the two solutions given by (11) for the mass point motion, and the general solution given by (19) that also includes the internal deformation of the landslide associated with the velocity gradient or the non-linear advection  $u \partial u / \partial x$  in (5). They behave essentially differently right after the mass release. The mass point model substantially overestimates landslide velocity derived by the more realistic general model. However, the reduced dimensional models and solutions considered here may give upper bounds to reality because they do not account for the lateral spreading of the landslide mass. Such problems can only be solved comprehensively by considering the numerical simulations on a full three-dimensional digital terrain model (Mergili et al., 2020a,



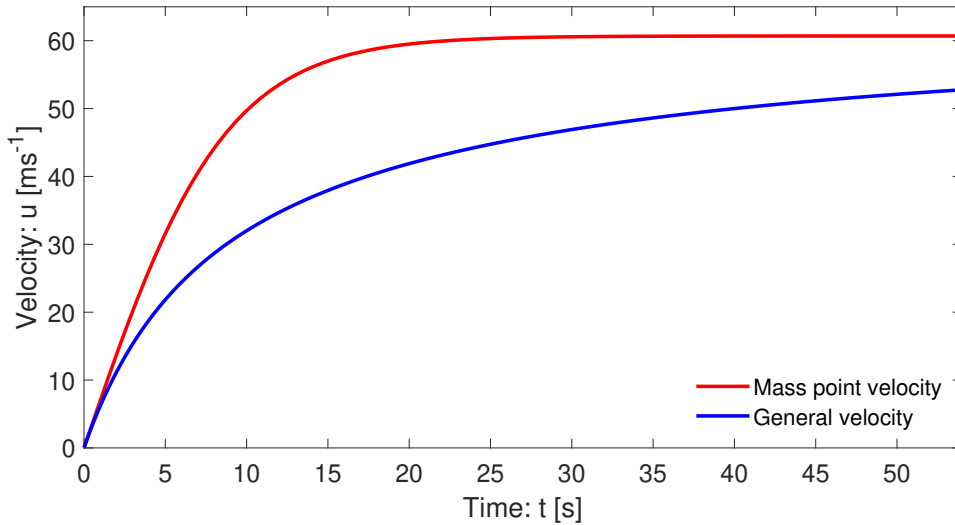

Figure 8: The velocity profiles for a landslide with the mass point motion as given by (11), and the motion including the internal deformation as given by the general solution (19). **The two solutions behave fundamentally differently.**

504 2020b; Shugar et al., 2021) by employing the full dynamical mass flow model equations (Pudasaini and Mergili,  
 505 2019) without constraining the lateral spreading.

#### 506 4.7 A fundamentally new understanding

507 The new general solution (19) and its plot in Fig. 8 provides a fundamentally new aspect in our understanding  
 508 of landslide velocity. The physics behind the substantially, but legitimately, reduced velocity provided by the  
 509 general velocity (19) as compared to the mass point velocity (11) is revealed here for the first time. The gap  
 510 between the two solutions increases steadily until a substantially large time (here about  $t = 20$  s), then the gap  
 511 is reduced slowly. This is so because, after  $t = 20$  s the mass point velocity is close to its steady value (about  
 512  $60.1 \text{ m s}^{-1}$ ). In the meantime, after  $t = 20$  s, the general velocity continues to increase but slowly, and after a  
 513 long time, it also tends to approach the steady-state. This substantially lower velocity in the general solution  
 514 is realistic. Its mechanism can be explained. It becomes clear by analysing the form of the model equation  
 515 (5). For the ease of analysis, we assume the accelerating flow down the slope. For such a situation, both  $u$  and  
 516  $\partial u/\partial x$  are positive, and thus,  $u\partial u/\partial x > 0$ . The model (5) can also be written as

$$\frac{\partial u}{\partial t} = (\alpha - \beta u^2) - u \frac{\partial u}{\partial x}. \quad (36)$$

517 Then, from the perspective of the time evolution of  $u$ , the last term on the right hand side can be interpreted  
 518 as a negative force additional to the system (10) describing the mass point motion. This is responsible for the  
 519 substantially reduced velocity profile given by (19) as compared to that given by (11). The lower velocity in  
 520 (19) can be perceived as the outcome of the energy consumed in the deformation of the landslide associated  
 521 with the spatial velocity gradient that can also be inferred by the negative force attached with  $-u\partial u/\partial x$  in  
 522 (36). Moreover,  $u\partial u/\partial x$  in (5) can be viewed as the inertial term of the system (Bertini et al., 1994). However,  
 523 after a sufficiently long time the drag is dominant, resulting in the decreased value of  $\partial u/\partial x$ . Then, the effect  
 524 of this negative force is reduced. Consequently, the difference between the mass point solution and the general  
 525 solution decreases. However, these statements must be further scrutinized.

## 526 5 The Landslide Velocity: General Solution - II

527 Below, we have constructed a further exact analytical solution to our velocity equation based on the method  
 528 of Montecinos (2015). Consider the model (5) and assign an initial condition:

$$\frac{\partial u}{\partial t} + u \frac{\partial u}{\partial x} = \alpha - \beta u^2, \quad u(x, 0) = s_0(x). \quad (37)$$

529 This is a non-linear advective - dissipative system, and can be perceived as an inviscid, dissipative, non-  
 530 homogeneous Burgers' equation. First, we note that,  $H(x)$  is a primitive of a function  $h(x)$  if  $\frac{dH(x)}{dx} = h(x)$ .  
 531 Then, we summarize the Montecinos (2015) solution method in a theorem:

532 **Theorem 5.1:** Let  $\frac{1}{f(u)}$  be an integrable function. Then, there exists a function  $\mathcal{E}(t, s_0(y))$  with its primitive  
 533  $\mathcal{F}(t, s_0(y))$ , such that, the initial value problem

$$\frac{\partial u}{\partial t} + u \frac{\partial u}{\partial x} = f(u), \quad u(x, 0) = s_0(x), \quad (38)$$

534 has the exact solution  $u(x, t) = \mathcal{E}(t, s_0(y))$ , where  $y$  satisfies  $x = y + \mathcal{F}(t, s_0(y))$ .

535 Following Theorem 5.1, **after a bit lengthy calculation (below in Section 5.1)**, we obtain **(in Section 5.1)** the  
 536 exact analytical solution (**Solution E**) for (37):

$$u(x, t) = \sqrt{\frac{\alpha}{\beta}} \tanh \left[ \sqrt{\alpha\beta} t + \tanh^{-1} \left\{ \sqrt{\frac{\beta}{\alpha}} s_0(y) \right\} \right], \quad (39)$$

537 where  $y = y(x, t)$  is given by

$$x = y + \frac{1}{\beta} \ln \left[ \cosh \left\{ \sqrt{\alpha\beta} t + \tanh^{-1} \left\{ \sqrt{\frac{\beta}{\alpha}} s_0(y) \right\} \right\} \right] - \frac{1}{\beta} \ln \left[ \cosh \left\{ \tanh^{-1} \left\{ \sqrt{\frac{\beta}{\alpha}} s_0(y) \right\} \right\} \right], \quad (40)$$

538 and,  $s_0(x) = u(x, 0)$  provides the functional relation for  $s_0(y)$ . In contrast to (19), (39)-(40) are the direct  
 539 generalizations of the mass point solutions given by (11) and (13). This is an advantage.

540 The solution strategy is as follows: Use the definition of  $s_0(y)$  in (40). Then, solve for  $y$ . Go back to the  
 541 definition of  $s_0(y)$  and put  $y = y(x, t)$  in  $s_0(y)$ . This  $s_0(y)$  is now a function of  $x$  and  $t$ . Finally, put  
 542  $s_0(y) = f(x, t)$  in (39) to obtain the required general solution for  $u(x, t)$ . In principle, the system (39)-(40) may  
 543 be solved explicitly for a given initial condition. One of the main problems in solving (39)-(40) lies in inverting  
 544 (40) to acquire  $y(x, t)$ . Moreover, we note that, generally, (19) and (39)-(40) may provide different solutions.

### 545 5.1 Derivation of the solution to the general model equation

546 The solution method involves some sophisticated mathematical procedures. However, here we present a compact  
 547 but a quick solution description to our problem. The equivalent ordinary differential equation to the partial  
 548 differential equation system (37) is

$$\frac{d\hat{u}}{dt} = \alpha - \beta \hat{u}^2, \quad \hat{u}(0) = s(0), \quad (41)$$

549 which has the solution

$$\hat{u}(t) = \mathcal{E}(t, s(0)) = \sqrt{\frac{\alpha}{\beta}} \tanh \left[ \sqrt{\alpha\beta} t + \tanh^{-1} \left\{ \sqrt{\frac{\beta}{\alpha}} s(0) \right\} \right]. \quad (42)$$

550 Consider a curve  $x$  in the  $x - t$  plane that satisfies the ordinary differential equation

$$\frac{dx}{dt} = \mathcal{E}(t, s_0(y)) = \sqrt{\frac{\alpha}{\beta}} \tanh \left[ \sqrt{\alpha\beta} t + \tanh^{-1} \left\{ \sqrt{\frac{\beta}{\alpha}} s_0(y) \right\} \right], \quad x(0) = y. \quad (43)$$

551 Solving the system (43), we obtain,

$$\begin{aligned} x &= y + \mathcal{F}(t, s_0(y)) \\ &= y + \frac{1}{\beta} \ln \left[ \cosh \left\{ \sqrt{\alpha\beta} t + \tanh^{-1} \left\{ \sqrt{\frac{\beta}{\alpha}} s_0(y) \right\} \right\} \right] - \frac{1}{\beta} \ln \left[ \cosh \left\{ \tanh^{-1} \left\{ \sqrt{\frac{\beta}{\alpha}} s_0(y) \right\} \right\} \right]. \end{aligned} \quad (44)$$

552 So, the exact solution to the problem (37) is given by

$$u(x, t) = \mathcal{E}(t, s_0(y)) = \sqrt{\frac{\alpha}{\beta}} \tanh \left[ \sqrt{\alpha\beta} t + \tanh^{-1} \left\{ \sqrt{\frac{\beta}{\alpha}} s_0(y) \right\} \right], \quad (45)$$

553 where  $y$  satisfies (44).

## 554 5.2 Recovering the mass point motion

555 It is interesting to observe the structure of the solutions given by (39)-(40). For a constant initial condition,  
556 e.g.,  $s_0(x) = \lambda_0$ ,  $s_0(y) = \lambda_0$ , (39) and (40) are decoupled. Then, (39) reduces to

$$u(x, t) = \sqrt{\frac{\alpha}{\beta}} \tanh \left[ \sqrt{\alpha\beta} t + \tanh^{-1} \left( \sqrt{\frac{\beta}{\alpha}} \lambda_0 \right) \right]. \quad (46)$$

557 For  $t = 0$ ,  $u(x, 0) = u_0(x) = \lambda_0$ , which is the initial condition. Furthermore, (40) takes the form:

$$x = x_0 + \frac{1}{\beta} \ln \left[ \cosh \left\{ \sqrt{\alpha\beta} t + \tanh^{-1} \left( \sqrt{\frac{\beta}{\alpha}} \lambda_0 \right) \right\} \right] - \frac{1}{\beta} \ln \left[ \cosh \left\{ \tanh^{-1} \left( \sqrt{\frac{\beta}{\alpha}} \lambda_0 \right) \right\} \right], \quad (47)$$

558 from which we see that for  $t = 0$ ,  $x = y = x_0$ , which is the initial position. With this, we observe that (46) and  
559 (47) are the mass point solutions (11) and (13), respectively.

## 560 5.3 A particular solution

561 For the choice of the initial condition  $s_0(x) = \sqrt{\frac{\alpha}{\beta}} \tanh [\cosh^{-1} \{\exp(\beta x)\}]$ , combining (39) and (40) **after a**  
562 **bit of algebra**, leads to

$$u(x, t) = \sqrt{\frac{\alpha}{\beta}} \tanh [\cosh^{-1} \{\exp(\beta x)\}], \quad (48)$$

563 which, surprisingly, is the same as the initial condition. However, we can now legitimately compare (48) with  
564 the previously obtained solution (8), which is the steady-state motion with viscous drag. These two solutions  
565 have been presented in Fig. 9. The very interesting fact is that (8) and (48) turned out to be the same. For a  
566 real valued parameter  $\beta$  and a real variable  $x$ , this reveals an important mathematical identity, that

$$\tanh [\cosh^{-1} \{\exp(\beta x)\}] = \sqrt{1 - \exp(-2\beta x)}. \quad (49)$$

567 This means, the very complex function on the left hand side can be replaced by the much simpler function on  
568 the right hand side. Moreover, taking the limit as  $\beta \rightarrow 0$  in (48) and comparing it with (7), we obtain another  
569 functional identity:

$$\lim_{\beta \rightarrow 0} \frac{1}{\sqrt{\beta}} \tanh [\cosh^{-1} \{\exp(\beta x)\}] = \sqrt{2x}. \quad (50)$$

570 These identities have mathematical significance.

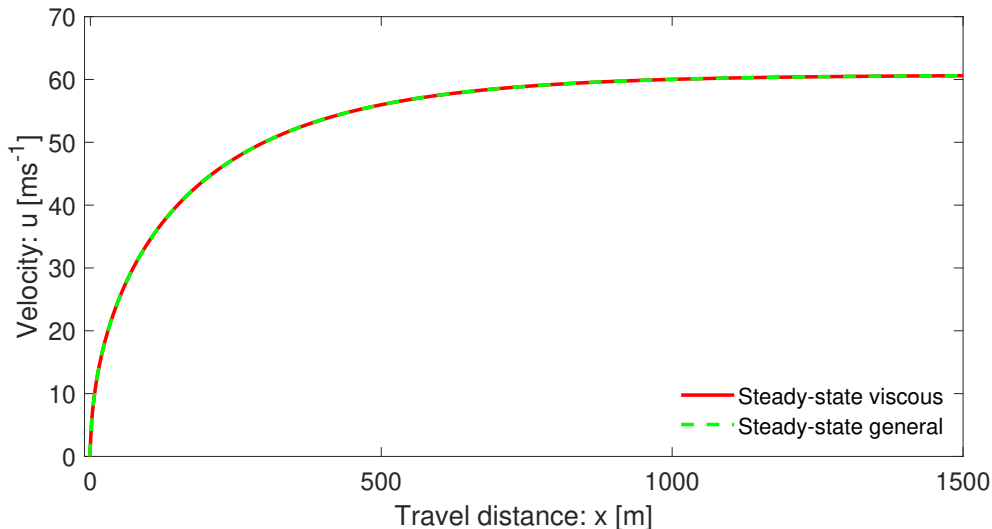

Figure 9: The velocity profile down a slope as a function of position for a landslide given by (39)-(40) reduced to the steady-state (48) against the steady-state solution with viscous drag given by (8). They match perfectly.

#### 5.4 Time marching general solution

Any initial condition can be applied to the solution system (39)-(40). For the purpose of demonstrating the functionality of this system, here we consider two initial conditions:  $s_0(x) = x^{0.50}$  and  $s_0(x) = x^{0.65}$ . The corresponding results are presented in Fig. 10. This figure clearly shows time marching of the landslide motion that also stretches as it slides down. Such deformation of the landslide stems from the term  $u\partial u/\partial x$  and the applied forces  $\alpha - \beta u^2$  in our primary model (5). We will elaborate on this later. This proves our hypothesis on the importance of the non-linear advection and external forcing on the deformation and motion of the landslide. The mechanism and dynamics of the advection, stretching and approaching to the steady-state can be explained with reference to the general solution. For this, consider the lower panel with initial condition  $s_0(x) = x^{0.65}$ . At  $t = 0.0$  s, (40) implies that  $y = x$ , then from (39),  $u(x, t) = s_0(x)$ , which is the initial condition. Such a velocity field can take place in relatively early stage of the developed motion of large natural events (Erismann and Abele, 2001; Huggel et al., 2005; Evans et al., 2009; Mergili et al., 2018). This is represented by the  $t = 0.0$  s curve. For the next time, say  $t = 2.0$  s, the spatial domain of  $u$  expands and shifts to the right as defined by the rule (40). It has three effects in (39). First, due to the shift of the spatial domain, the velocity field  $u$  is relocated to the right (downstream). Second, because of the increased  $t$  value, and the spatial term associated with  $\tanh^{-1}$ , the velocity field is elevated. Third, as the  $\tanh$  function defines the maximum value of  $u$  (about  $60.1 \text{ m s}^{-1}$ ), the velocity field is controlled (somehow appears to be rotated). This dynamics also applies for  $t > 2.0$  s. These jointly produce beautiful spatio-temporal patterns in Fig. 10. Since the maximum of the initial velocity was already close to the steady-state value (the right-end of the curve), the front of the velocity field is automatically and strongly controlled, limiting its value to  $60.1 \text{ m s}^{-1}$ . So, although the rear velocity increases rapidly, the front velocity remains almost unchanged. After a sufficiently long time,  $t \geq 15$  s, the rear velocity also approaches the steady-state value. Then, the entire landslide moves downslope virtually with the constant steady-state velocity, without any substantial stretching. We can similarly describe the dynamics for the upper panel in Fig. 10. However, these two panels reveal an important fact that the initial condition plays an important role in determining and controlling the landslide dynamics.

#### 5.5 Landslide stretching

The stretching (or, deformation) of the landslide propagating down the slope depends on the evolution of its front ( $x_f$ ) and rear ( $x_r$ ) positions with maximum and minimum speeds, respectively. This has been shown in Fig. 11 corresponding to the initial condition  $s_0(x) = x^{0.65}$  in Fig. 10. It is observed that the rear position

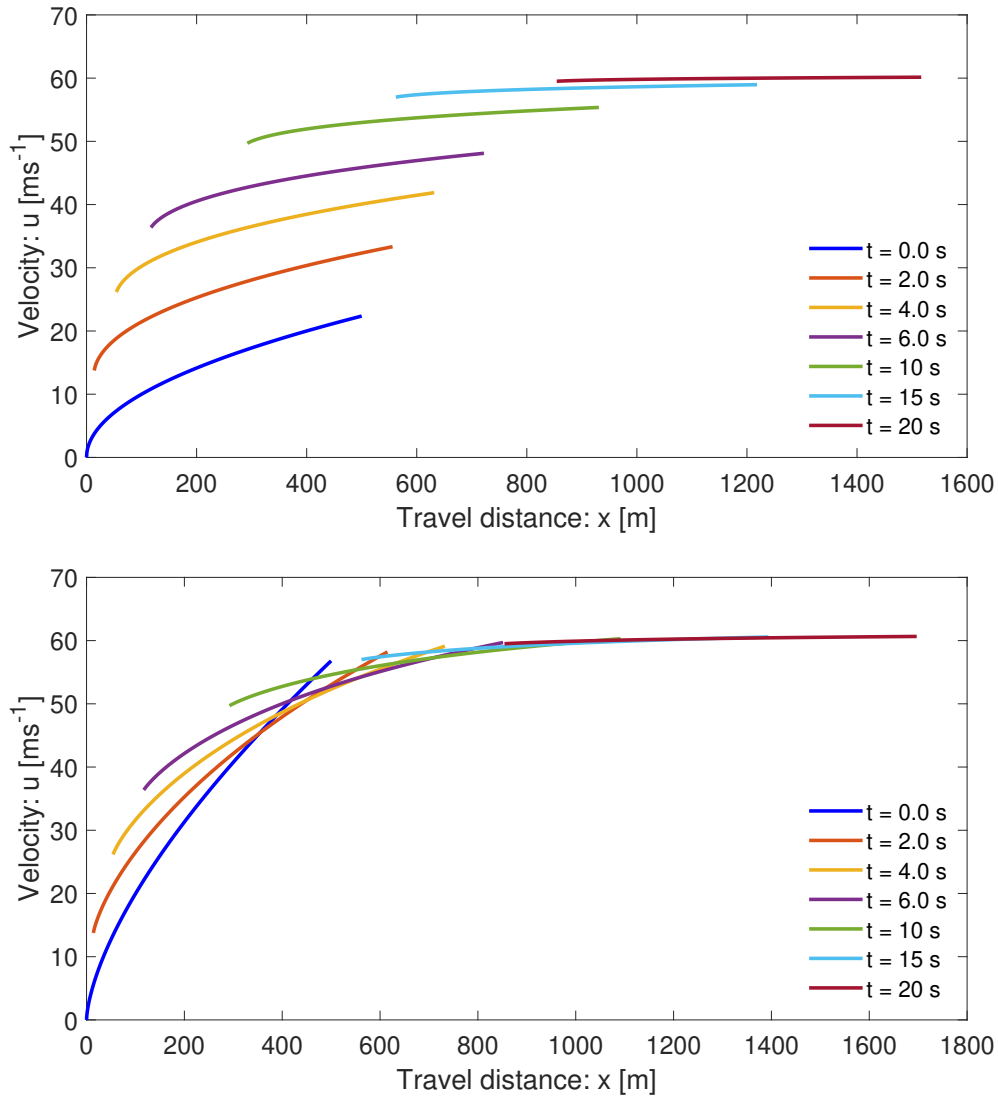

Figure 10: Time evolution of velocity profiles of propagating and stretching landslides down a slope, and as functions of position including the internal deformations as given by the general solution (39)-(40) of (5). The profiles **correspond to evolve based on** the initial conditions  $s_0(x) = x^{0.50}$  (top panel,  $t = 0.0$  s) and  $s_0(x) = x^{0.65}$  (bottom panel,  $t = 0.0$  s), respectively.

600 evolves strongly non-linearly whereas the front position advances only weakly non-linearly.

601 In order to better understand the rate of stretching of the landslide, in Fig. 12, we also plot the difference  
 602 between the front and rear positions as a function of time. It shows the stretching (rate) of the rapidly  
 603 deforming landslide. The stretching dynamics is determined by the front and rear positions of the landslide in  
 604 time, as has been shown in Fig. 11. In the early stages, the stretching increases rapidly. However, in later times  
 605 (about  $t \geq 15$  s) it increases only slowly, and after a sufficiently long time, (the rate of) stretching vanishes  
 606 as the landslide has already been fully stretched. **This can be understood, because after a sufficiently long**  
 607 **time, the motion is in steady-state. The two panels in Fig. 10 also clearly indicate that the stretching (rate)**  
 608 **depends on the initial condition. This can be understood, because after a sufficiently long time, the motion is**  
 609 **in steady-state. Nevertheless, the ways the two solutions reach the steady-state are different. The two panels**  
 610 **in Fig. 10 also clearly indicate that the stretching (rate) depends on the initial condition.**

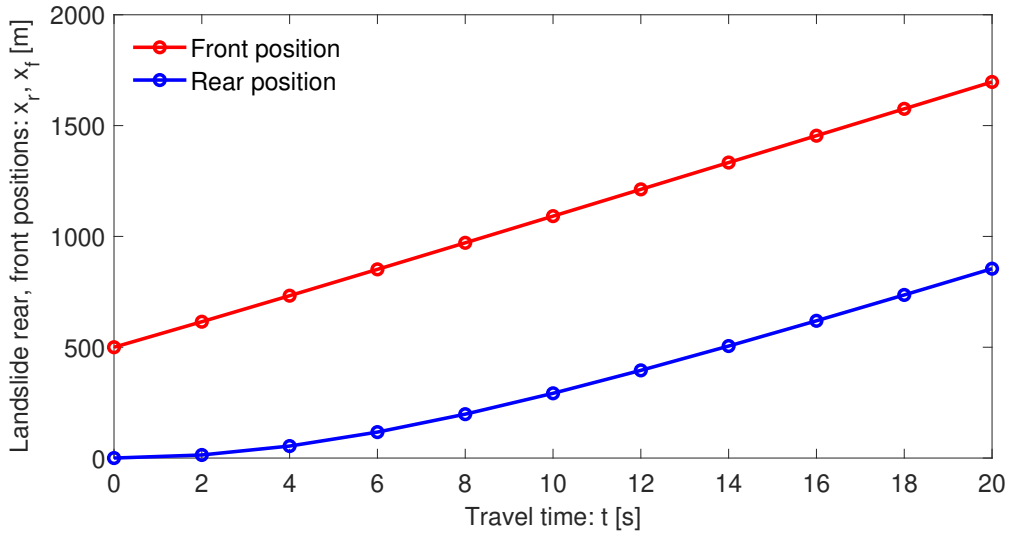

Figure 11: Time evolution of the front and rear positions of the landslide as it moves down the slope including the internal deformation given by the general solution (39)-(40) of (5), corresponding to the initial condition  $s_0(x) = x^{0.65}$  in Fig. 10.

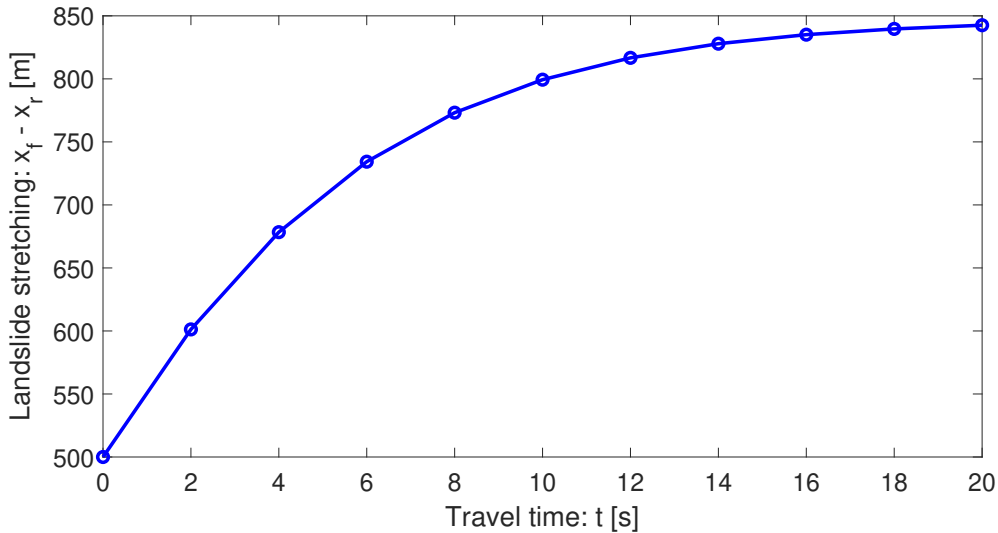

Figure 12: Time stretching of the landslide down the slope including the internal deformation given by the general solution (39)-(40) of (5), corresponding to the initial condition  $s_0(x) = x^{0.65}$  in Fig. 10.

## 611 5.6 Describing the dynamics

612 The dynamics observed in Fig. 10 and Fig. 12 can be described with respect to the general model (5) or (37)  
 613 and its solution given by (39)-(40). The nice thing about (39) is that it can be analyzed in three different  
 614 ways: with respect to the first or second or both terms on the right hand side. If we disregard the first term  
 615 involving time, then we explicitly see the effect of the second term that is responsible for the spatial variation  
 616 of  $u$  for each time employed in (40). This results in the shift of the solution for  $u$  to the right, and in the mean  
 617 time, the solution stretches but without changing the possible maximum value of  $u$  (not shown). Stretching  
 618 continues for higher times, however, for a sufficiently long time, it remains virtually unchanged. On the other  
 619 hand, if we consider both the first and second terms on the right hand side of (39), but use the initial velocity  
 620 distribution only for a very small  $x$  domain, say  $[0, 1]$ , then, we effectively obtain the mass point solutions

621 given in Fig. 1 and Fig. 2 **top and bottom panels** corresponding to (8) and (11), respectively for the spatial  
622 and time evolutions of  $u$ . This is so, because now the very small initial domain for  $x$  essentially defines the  
623 velocity field as if it was for a center of mass motion. Then, as time elapses, the domain shifts to the right and  
624 the velocity increases. Now, plotting the velocity field as a function of space and time recovers the solutions in  
625 Fig. 1 and Fig. 2. In fact, if we collect all the minimum values of  $u$  (the left end points) in Fig. 10 (bottom  
626 panel) and plot them in space and time, we acquire both the results in Fig. 1 and Fig. 2. These are effectively  
627 the mass point solutions for the spatial and time variation of the velocity field, because these results only focus  
628 on the left end values of  $u$ , akin to the mass point motion. This means, (40) together with (39) is responsible  
629 for the dynamics presented in Fig. 10, Fig. 11 and Fig. 12 corresponding to the term  $u\partial u/\partial x$  and  $\alpha - \beta u^2$   
630 in the general model (5) or (37). So, the dynamics is specially architected by the advection  $u\partial u/\partial x$  and  
631 controlled by the system forcing  $\alpha - \beta u^2$ , through the model parameters  $\alpha$  and  $\beta$ . This will be discussed in  
632 more detail in Section 5.7 - Section 5.9. This is **fascinating, a fantastic situation**, because, it reveals the fact  
633 that the shifting, stretching and lifting of the velocity field stems from the term  $u\partial u/\partial x$  in (37). After a long  
634 time, as drag strongly dominates the other system forces, the velocity approaches the steady-state, practically  
635 the velocity gradient vanishes, and thus, the stretching ceases. Then, the landslide just moves down the slope  
636 at a constant velocity without any further dynamical complication.

## 637 5.7 Rolling out the initial velocity

638 It is compelling to see how the solution system (39)-(40) rolls out an initially constant velocity across specific  
639 curves. For this, consider an initial velocity  $s_0(x) = 0$  in a small domain, say  $[0, 3]$ , and take a point in it.  
640 Then, generate solutions for different times, beginning with  $t = 0.0$  s, with 2.0 s increments. As shown in  
641 Fig. 13, the space and time evolutions of the velocity fields for a mass point motion given by (8) and (11)  
642 have been exactly rolled-up and covered by the system (39)-(40) by transporting the initial velocity along these  
643 curves (indicated by the star symbols). As explained earlier, the mechanism is such that, in time, (40) shifts  
644 the solution point (domain) to the right and (39) up-lifts the velocity exactly lying on the mass point velocity  
645 curves designed by (8) and (11). So, the system (39)-(40) generalizes the mass point motion in many different  
646 ways.

## 647 5.8 Breaking wave and folding

648 Next, we show how the new model (5) and its solution system (39)-(40) can mould the breaking wave in  
649 mass transport and describe the folding of a landslide. For this, consider a sufficiently smooth initial velocity  
650 distribution given by  $s_0(x) = 5 \exp(-x^2/50)$ . Such a distribution can be realized, e.g., as the landslide starts  
651 to move, its center might have been moving at the maximum initial velocity due to some localized strength  
652 weakening mechanism (examples include liquefaction, frictional strength loss; blasting; seismic shaking), and  
653 the strength weakening diminishes quickly away from the center. This later leads to a highly stretchable  
654 landslide from center to the back, while from center to the front, the landslide contracts strongly. The time  
655 evolution of the solution has been presented in Fig. 5.8. The top panel for the usual drag as before ( $\beta = 0.0019$ ),  
656 while the bottom panel with higher drag ( $\beta = 0.019$ ). The drag strongly controls the wave breaking and folding,  
657 and also the magnitude of the landslide velocity. Here, we focus on the top panel, but similar analysis also  
658 holds for the bottom panel.

659 Wave breaking and folding are often observed important dynamical aspects in mass transport and formation  
660 of geological structures. Figure 5.8 reveals a thrilling dynamics. The most fascinating feature is the velocity  
661 wave breaking and how this leads to the emergence of folding of the landslide. This can be explained with  
662 respect to the mechanism associated with the solution system (39)-(40). As  $u\partial u/\partial x$  is positive to the left  
663 and negative to the right of the maximum initial velocity, the motion to the left of the maximum initial  
664 velocity overtakes the velocity to the right of the maximum position. As the position of the maximum velocity  
665 accelerates downslope with the fastest speed, after a sufficiently long time, a kink around the front of the  
666 velocity wave develops, here after  $t = 2$  s. This marks the velocity wave breaking (shock wave formation) and  
667 the beginning of the folding. However, the rear stretches continuously. Although mathematically a folding may  
668 refer to a singularity due to a multi-valued function, here we explain the folding dynamics as a phenomenon

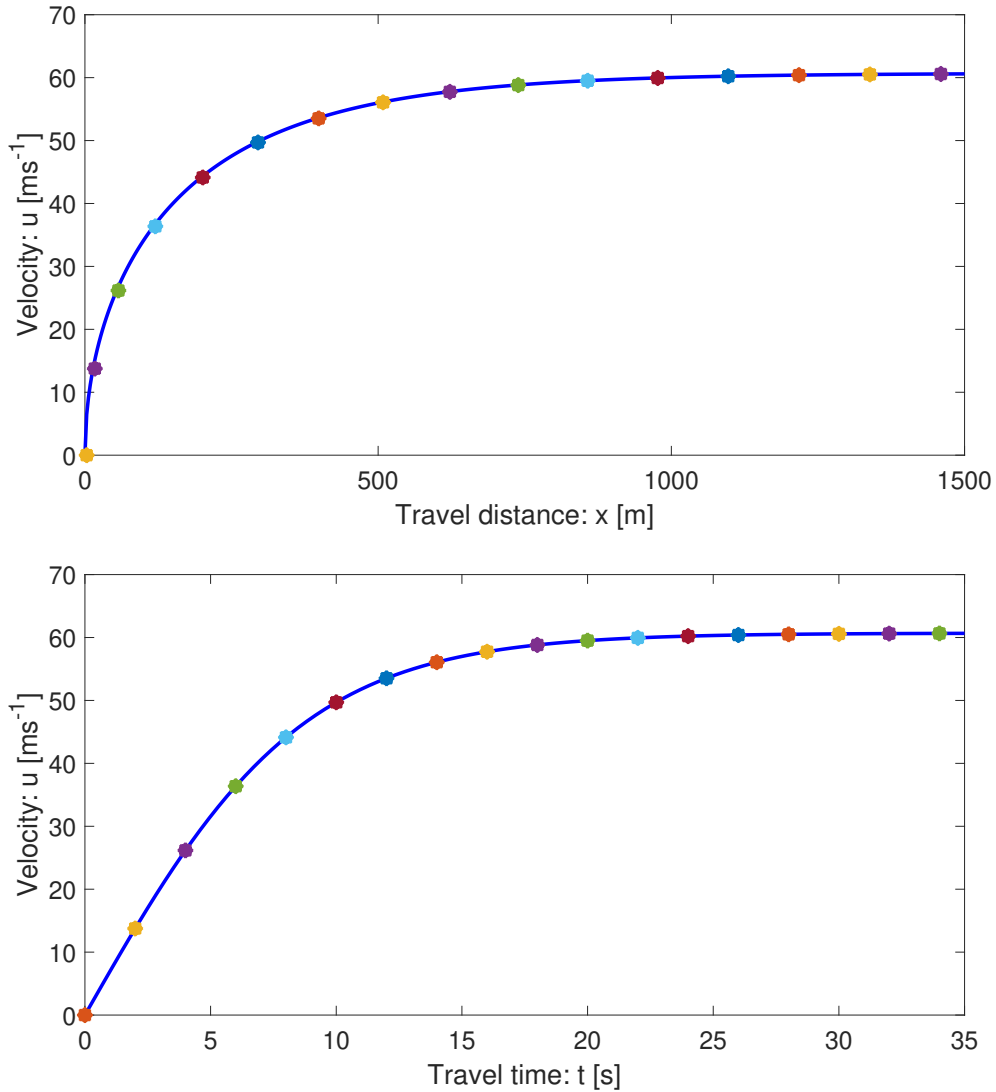

Figure 13: Spatial (top) and temporal (bottom) transportations of the initial velocity ( $u = 0$ ) of the landslide down the slope by the general solution system (39)-(40) as indicated by the star markings for times  $t = 0.0$  s, with 2.0 s increments. These solutions exactly fit with the space and time evolutions of the velocity fields (curves) for the mass point motions given by (8) and (11).

669 that can appear in nature. In time, the folding intensifies, the folding length increases, but the folding gap  
 670 decreases. After a long time, virtually the folding gap vanishes and the landslide moves downslope at the  
 671 steady-state velocity with a perfect fold in the frontal part (not shown), while in the back, it maintains a  
 672 single large stretched layer. This happened collectively as the system (39)-(40) simultaneously introduced  
 673 three components of the landslide dynamics: downslope propagation, velocity up-lift and breaking or folding in  
 674 the frontal part while stretching in the rear. This physically and mathematically proves that the non-uniform  
 675 motion (with its maximum somewhere interior to the landslide) is the basic requirement for the development  
 676 of the breaking wave and the emergence of landslide folding. **This is a seminal understanding.**

## 677 5.9 Recovering Burgers' model

678 As the external forcing vanishes, i.e., as  $\alpha \rightarrow 0, \beta \rightarrow 0$ , the landslide velocity equation (5) reduces to the  
 679 classical inviscid Burgers' equation. Then, for  $\alpha \rightarrow 0, \beta \rightarrow 0$ , one would expect that the general solution  
 680 (39)-(40) should also reduce to the formation of the shock wave and wave breaking generated by the inviscid



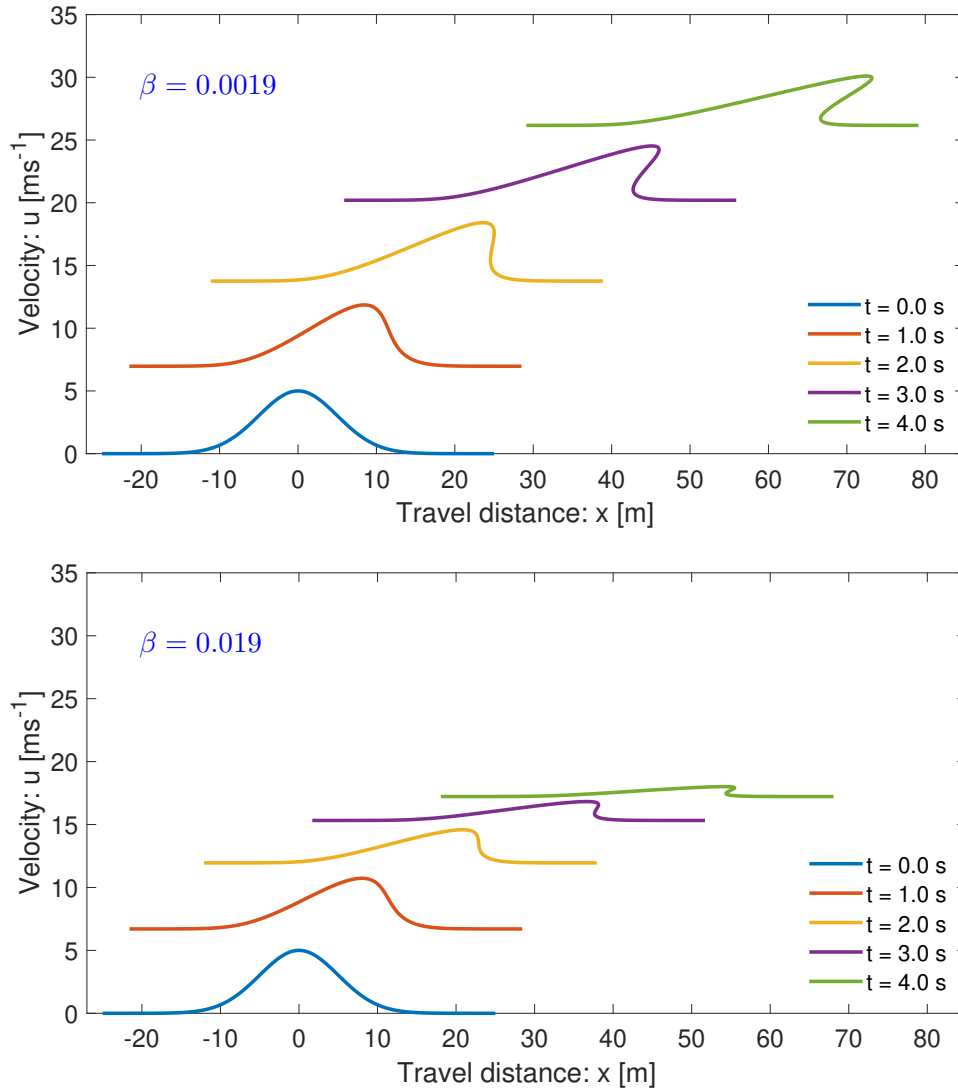

Figure 14: The breaking wave and folding as a landslide propagates down a slope. The top panel with lower drag  $\beta = 0.0019$ , while the bottom panel with higher drag,  $\beta = 0.019$ , which showing the drag strongly controls the wave breaking and folding, and also the magnitude of the landslide velocity.

681 Burgers' equation. In fact, as shown in Fig. 15, this has exactly happened. For this, the solution domain  
 682 remains fixed, and the solution are not uplifted. This proves that Burgers' equation is a special case of our  
 683 model (5).

### 684 5.10 The viscous drag effect

685 It is important to understand the dynamic control of the viscous drag on the landslide motion. For this, we set  
 686  $\alpha \rightarrow 0$ , but increased the value of the viscous drag parameter by one and two orders of magnitude. The results  
 687 are shown in Fig. 16. In connection to Fig. 15, there are two important observations. First, the translation and  
 688 stretching of the domain is solely dependent on the net driving force  $\alpha$ , and when it is set to zero, the  
 689 domain remains fixed. Second, the viscous drag parameter  $\beta$  effectively controls the magnitude of the velocity  
 690 field and the wave breaking. Depending on the magnitude of the viscous drag coefficient, the generation of  
 691 the shock wave and the wave breaking can be dampened (top panel) or fully controlled (bottom panel). The  
 692 bottom panel further reveals, that with properly selected viscous drag coefficient, the new model can describe

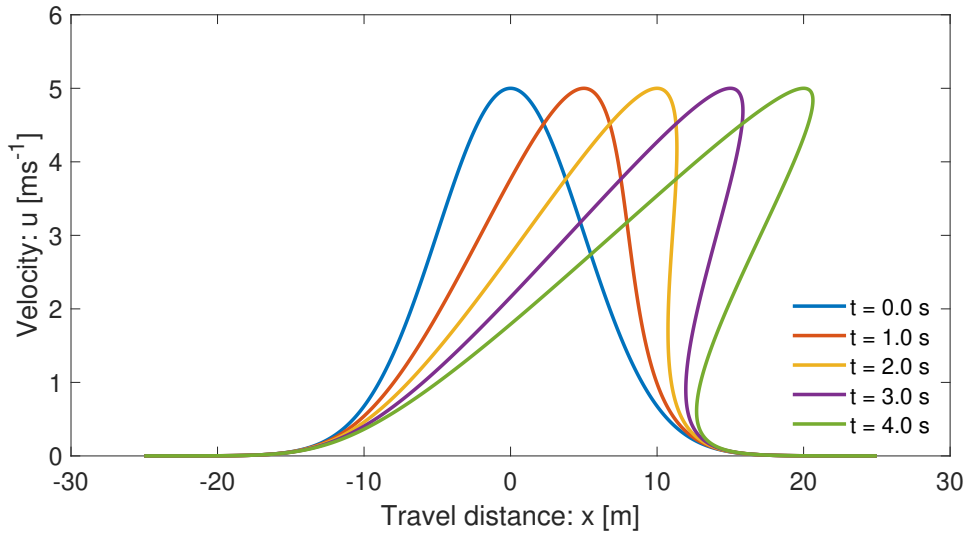

Figure 15: Recovering the Burgers' shock formation and breaking of the wave by the solution system (39)-(40) of the new model (5) in the limit of the vanishing external forcing, i.e.,  $\alpha \rightarrow 0, \beta \rightarrow 0$ .

693 the deposition process of the mass transport and finally brings it to a standstill. In contrast to the classical  
 694 inviscid Burgers' equation, due to the viscous drag effect, our model (5) is dissipative, and can be recognized  
 695 as a dissipative inviscid Burgers' equation. However, here the dissipation is not due to the diffusion but due to  
 696 the viscous drag.

## 697 6 Discussions

698 **Exact** analytical solutions of the underlying physical-mathematical models significantly improve our knowledge  
 699 of the basic mechanism of the problem. On the one hand, **such exact, analytical** solutions disclose many  
 700 new and essential physics, and thus, may find applications **broadly** in environmental and engineering mass  
 701 transports down natural slopes or industrial channels. The reduced and problem-specific solutions provide  
 702 important insights into the full behavior of the complex landslide system, mainly the landslide motion with non-  
 703 linear internal deformation together with the external forcing. On the other hand, exact analytical solutions  
 704 to simplified cases of non-linear model equations are necessary to calibrate numerical simulations (Chalfen  
 705 and Niemiec, 1986; Pudasaini, 2011, 2016; Ghosh Hajra et al., 2018). For this reason, this paper is mainly  
 706 concerned about the development of a new general landslide velocity model and construction of several novel  
 707 exact analytical solutions for landslide velocity.

708 Analytical solutions provide the fastest, cheapest, and probably the best solution to a problem as measured  
 709 from their rigorous nature and representation of the dynamics. Proper knowledge of the landslide velocity  
 710 is required in accurately determining the dynamics, travel distance and enormous destructive impact energy  
 711 carried by the landslide. The velocity of a landslide is associated with its internal deformation (inertia) and the  
 712 externally applied system forces. The existing influential analytical landslide velocity models do not include  
 713 many important forces and internal deformation. The classical analytical representation of the landslide velocity  
 714 appear to be incomplete and restricted, both from the physics and the dynamics point of view. No velocity  
 715 model has been presented yet that simultaneously incorporates inertia and the externally applied system forces  
 716 that play crucial role in explaining important aspects of landslide propagation, motion and deformation.

717 We have presented the first-ever, physics-based, analytically constructed simple, but more general landslide  
 718 velocity model. There are two main collective model parameters: the net driving force and drag. By rigorous  
 719 derivations of the exact analytical solutions, we showed that incorporation of the non-linear advection and  
 720 external forcing is essential for the physically correct description of the landslide velocity. In this regard, we

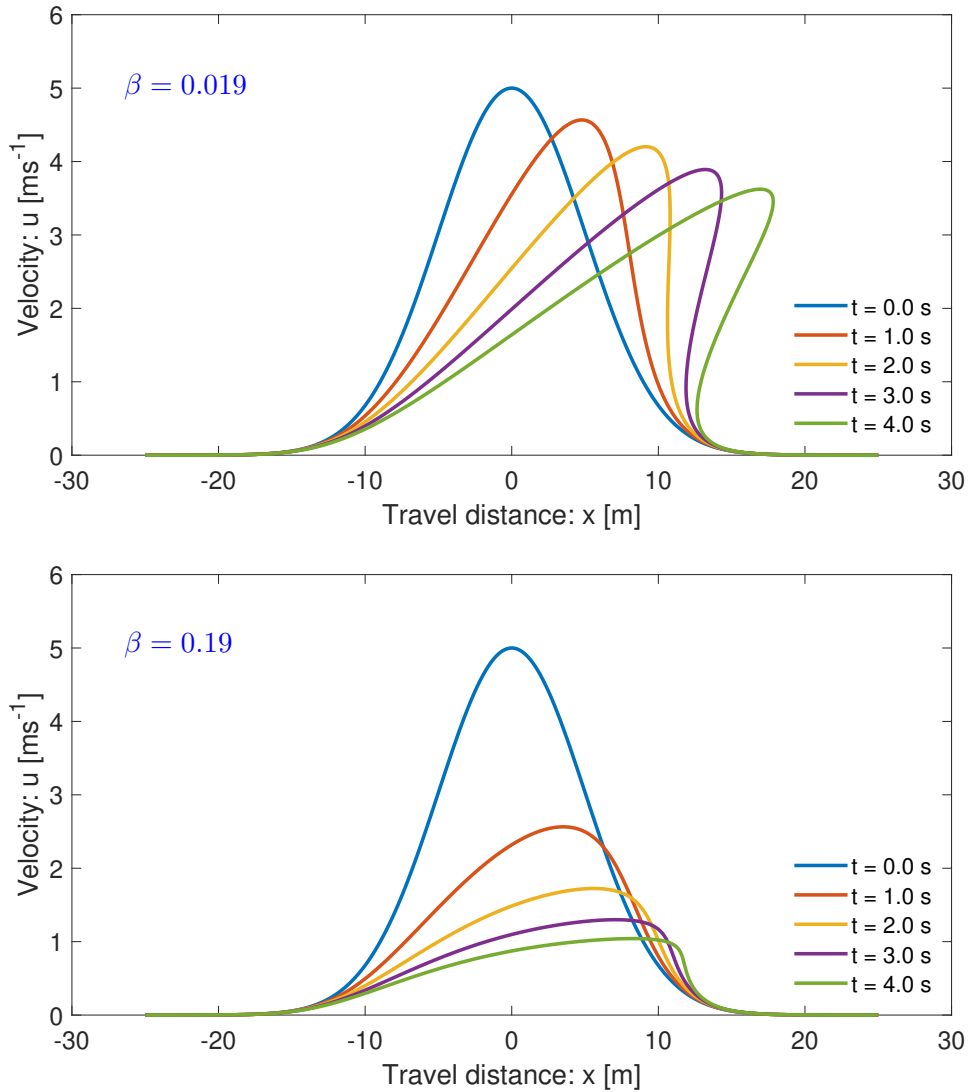

Figure 16: The control of the viscous drag on the dynamics of the landslide. The net driving force is set to zero, i.e.,  $\alpha = 0$ . The viscous drag has been amplified by one and two orders of magnitudes in the top ( $\beta = 0.019$ ) and bottom ( $\beta = 0.19$ ) panels, showing dampened or complete prevention of shock formation and wave breaking, respectively.

721 have presented a novel dynamical model for landslide velocity that precisely explains both the deformation and  
 722 motion by quantifying the effect of non-linear advection and the system forces.

723 Different exact analytical solutions for landslide velocity constructed in this paper independently support each  
 724 other. **and are compatible with the physics of landslide motion.** These physically meaningful solutions can  
 725 potentially be applied to calculate the complex non-linear velocity distribution of the landslide. Our new  
 726 results reveal that solutions to the more general equation for the landslide motion are **widely applicable. wide-**  
 727 **ranging and include the classical mass point Voellmy and Burgers models for mass transport as special cases.**  
 728 The new landslide velocity model **and** its advanced exact solutions made it possible now to analytically  
 729 study the complex landslide dynamics, including non-linear propagation, stretching, wave breaking and folding.  
 730 Moreover, these results clearly indicate that the proper knowledge of the model parameters  $\alpha$  and  $\beta$  is crucial  
 731 in reliable prediction of the landslide dynamics.

## 732 6.1 Advantages of the new model and its solutions

733 The new model may describe the complex dynamics of many extended physical and engineering problems  
734 appearing in nature, science and technology - connecting different types of complex mass movements and  
735 deformations. Specifically, the advantage of the new model equation is that the more general landslide velocity  
736 can now be obtained explicitly and analytically, that is very useful in solving relevant engineering and applied  
737 problems and has enormous application potential. **Broadly speaking, this is the first-ever physics-based model**  
738 **to do so.**

739 There are three distinct situations in modelling the landslide motion: (i) The spatial variation of the flow  
740 geometry and velocity can be negligible for which the entire landslide effectively moves as a mass point without  
741 any local deformation. This refers to the classical Voellmy model. (ii) The geometric deformation of the  
742 landslide can be parameterized or neglected, however, the spatial variation of the velocity field may play a  
743 crucial role in the landslide motion. In this circumstance, the landslide motion can legitimately be explained  
744 by the full form of the new landslide velocity equation (5). The constructed general solutions (19) and (39) -  
745 (40) of this model have revealed many important features of the dynamically deforming and advecting landslide  
746 motions. (iii) Both the landslide geometry and velocity may substantially change locally. Then, no assumptions  
747 on the spatial gradient of the geometry and velocity can be made. For this, only the full set of the basic model  
748 equations (1) - (2) can explain the landslide motion. While models and simulation techniques for situations (i)  
749 and (iii) are available in the literature, (ii) is entirely new, both physically and mathematically. It is evident  
750 that dynamically (ii) plays an important role, first in making the bridge between the two limiting solutions, and  
751 second, by providing **the fastest, cheapest and the most efficient solution. of the underlying problem.** Solutions  
752 (19) and (39)-(40) include the local deformation associated with the velocity gradient. However, except for  
753 parameterization, (19) and (39)-(40) do not explicitly include the geometrical deformation. As long as the  
754 spatial change in the landslide geometry is insignificant, we can use (19) or (39)-(40) to describe the landslide  
755 motion. These solutions also include mass point motions, and are valid before the fragmentation and/or the  
756 significant to large **large** geometric deformations. However, when the geometric deformations are significant,  
757 we must use (1) and (2) and solve them numerically with some high resolution numerical methods (Tai et al.,  
758 2002; Mergili et al., 2017, 2020a,b).

759 The model (19) or (39)-(40) and (1)-(2) are amicable and can be directly coupled. Such a coupling between  
760 the geometrically negligibly- or slowly- deforming landslide motion described by (19) or (39)-(40) and the full  
761 dynamical solution with any large to catastrophic deformations described by (1)-(2) is novel. First, this allows  
762 us to consistently couple the negligible or slowly deformable landslide with a fast (or, rapidly) deformable  
763 flow-type landslide (or, debris flow). Second, our method provides a very efficient simulation due to instant  
764 exact solution given by (19) or (39)-(40) prior to the large external geometric deformation that is then linked  
765 to the full model equations (1)-(2). The computational software such as r.avaflow (Mergili et al., 2017, 2020a,  
766 2020b; Pudasaini and Mergili, 2019) can substantially benefit from such a coupled solution method. Third,  
767 importantly, this coupling is valid for single-phase or multi-phase flows, because the corresponding model (5)  
768 is derived by reducing the multi-phase mass flow model (Pudasaini and Mergili, 2019).

769 Burgers' equation has no external forcing term. The solution domain remains fixed and does not stretch and  
770 propagate downslope. So, the initial velocity profile deforms and the wave breaks within the fixed domain.  
771 In contrast, our model (5) is fundamentally characterized and explained simultaneously by the non-linear  
772 advection  $u\partial u/\partial x$  and external forcing,  $\alpha - \beta u^2$ . The first designs the main dynamic feature of the wave, while  
773 the later induces rapid downslope propagation, stretching of the wave domain and quantification of the wave  
774 form and magnitude. These special features of our model are often observed phenomena in mass transport,  
775 and are freshly revealed here.

## 776 6.2 Compatibility, reliability and generality of the solutions

777 Within their scopes and structures, many of the analytical solutions constructed in Sections 3 - 5 are similar.  
778 This effectively implies the physical aspects of our general landslide velocity model (5), and also the compat-  
779 ibility and reliability of all the solutions. **We have seen that** The solutions (19) and (39)-(40) recover all the

780 mass point motions given by (11) and (13). **However, the analyses presented in Sections 3 - 5 reveal that** From  
781 the physical and dynamical point of view, the velocity profiles given by (19) and (39)-(40) as solutions of the  
782 general model for the landslide velocity (5) are much wider and better than those given by (11) and (13) as  
783 solutions of the mass point model (10).

784 Structurally, the solutions presented in Section 3 are only partly new, yet they are physically substantially  
785 advanced. However, in Section 4 and 5 we have presented entirely novel solutions, both physically and struc-  
786 turally. From physical and mathematical point of view, particularly important is the form of the general  
787 velocity model (5). First, it extends the classical Voellmy mass point model (Voellmy, 1955) by including: (i)  
788 much wider physical aspects of landslide types and motions, and (ii) the landslide dynamics associated with  
789 the internal deformation as described by the spatial velocity gradient associated with the advection. Second,  
790 the model (5) is the direct extension of the inviscid Burgers' equation by including a (quadratic) non-linear  
791 source as a function of the state variable. This source term contains all the applied forces appearing from the  
792 physics and mechanics of the landslide motion.

793 Moreover, as viewed from the general structure of the model (5), all the solutions constructed here can be  
794 utilized for any physical problems that can be cast and represented in the form (5), but independent of the  
795 definition of the model parameters  $\alpha$  and  $\beta$ , **and the state variable  $u$  (Faraoni, 2022).** **These parameters, and**  
796 **the initial (or, boundary) condition are dependent on the physics of the problem under consideration.**

### 797 **6.3 Importance and Implications**

798 **A further important feature is the construction of the general and particular exact analytical solutions to the**  
799 **model (5) and the description of their physical significance and application in quickly and efficiently solving**  
800 **technical problems. So, in short,** The new model (5) and its solutions have broad implications, mathematically,  
801 physically and technically. By deriving a general landslide velocity model and its various analytical exact solu-  
802 tions, we made a breakthrough in correctly determining the velocity of a deformable landslide that is controlled  
803 by several applied forces as it propagates down the slope. We achieve a novel understanding that the inertia and  
804 the forcing terms ultimately regulate the landslide motion and provide physically more appropriate analytical  
805 description of landslide velocity, dynamic impact and inundation. This addresses the long-standing scientific  
806 question of explicit and full analytical representation of velocity of deformable landslides. Such a description  
807 of the state of landslide velocity is innovative.

808 As the analytically obtained values well represent the velocity of natural landslides, technically, this provides  
809 a very important tool for the landslide engineers and practitioners in quickly, efficiently and accurately de-  
810 termining the landslide velocity. The general solutions presented here reveal an important fact that accurate  
811 information about the mechanical parameters, state of the motion and the initial condition is very important for  
812 the proper description of the landslide motion. We have extracted some interesting particular exact solutions  
813 from the general solutions. As direct consequences of the new general solutions, some important and non-  
814 trivial mathematical identities have been established that replace very complex expressions by straightforward  
815 functions.

## 816 **7 Summary**

817 **While existing analytical landslide velocity models cannot deal with the internal deformation and mostly fail to**  
818 **integrate a wide spectrum of externally applied forces, we developed a simple but general analytical model that**  
819 **is capable of including both of these important aspects. In this paper, we (i) derived a general landslide velocity**  
820 **model applicable to different types of landslide motions with internal deformations, and (ii) solve it analytically**  
821 **to obtain several exact solutions as a function of space and time for landslide motion, and highlight the essence**  
822 **of the new model to enhance our understanding of landslide dynamics. The model is developed by reducing**  
823 **a multi-phase mass flow equations (Pudasaini and Mergili, 2019) and includes the internal (local) deformation**  
824 **due to non-linear advection (inertia), and the external forcing consisting of the extensive net driving force**  
825 **and viscous drag. The model describes a dissipative system and involves dynamic interactions between the**

826 advection and external forcing that control the landslide deformation and motion. In the form, our model  
827 constitutes a unique and new class of non-linear advective - dissipative system with quadratic external forcing  
828 as a function of state variable, containing all system forces. The new model is a more general formulation, but  
829 can also be viewed as an extended inviscid, non-homogeneous, dissipative Burgers' equation. The form of the  
830 new equation is important as it may describe the dynamical state of many extended physical and engineering  
831 problems appearing in nature, science and technology. From the physical and mathematical point of view,  
832 there are two crucial novel aspects: First, it extends the classical Voellmy model due to the broad physics  
833 carried by the model parameters and additionally explains the dynamics of deforming landslide described by  
834 advection. So, our model provides a better and more detailed picture of the landslide motion by including the  
835 local deformation. Second, it extends the classical inviscid Burgers' equation by including the non-linear source  
836 term, as a quadratic function of the field variable. The source term accommodates the mechanics of underlying  
837 problem through the physical parameters, the net driving force and the dissipative viscous drag.

838 Due to the non-linear advection and quadratic forcing, the new general landslide velocity model poses a great  
839 mathematical challenge to derive explicit analytical solutions. We focused on constructing several new and  
840 general exact analytical solutions in more sophisticated forms. These solutions are strong, recover all the mass  
841 point motions and provide much wider spectrum for the landslide velocity than the classical Voellmy and  
842 Burgers' solutions. We have illustrated that the new system of solutions generalize the mass point motion in  
843 many different ways. The major role is played by the non-linear advection and system forces. The general  
844 solutions provide essentially new aspects in our understanding of landslide velocity. We have analytically  
845 proven that after a sufficiently long distance or time, the net driving force and drag always maintain a balance,  
846 resulting in the terminal velocity. We have also presented a new model for the viscous drag as the ratio between  
847 one half of the system-force and the relevant kinetic energy.

848 With the general solution, we revealed that different classes of landslides can be represented by different  
849 solutions under the roof of one velocity model. General solutions allowed us to simulate the progression and  
850 stretching (deforming) of the landslide as it slides down. Such deformation stems from the non-linear advection  
851 in our primary model. This proves our hypothesis on the importance of advection term on the deformation  
852 and motion. The mechanisms of advection, stretching and approaching to the steady-state have been explained  
853 with reference to the general solution. We disclose the fact that the shifting and stretching of the velocity field  
854 stem from the external forcing and non-linear advection. Also after a long time, as drag strongly dominates  
855 the system forces, the velocity approaches the steady-state, practically the velocity gradient vanishes, and thus,  
856 the stretching ceases. Then, the landslide propagates down the slope just at a constant velocity.

857 We have shown, that the general solution system can generate complex breaking waves in advective mass  
858 transport and describe the folding process of a landslide. Such phenomena have been presented and described  
859 mechanically for the first-time. The most fascinating feature is the dynamics of the wave breaking and the  
860 emergence of folding. These have been explained with respect to the intrinsic mechanism of our solution.  
861 This happened collectively as the solution system simultaneously introduces three important components of  
862 the landslide dynamics: downslope propagation and stretching of the domain, velocity up-lift, and breaking or  
863 folding in the frontal part while stretching in the rear. This physically proves that the non-uniform motion is  
864 the basic requirement for the development of breaking wave and emergence of the landslide folding. This is a  
865 novel understanding. We disclosed the fact that the translation and stretching of the domain, and lifting of  
866 the velocity field solely depends on the net driving force. Similarly, the viscous drag fully controls the shock  
867 wave generation, wave breaking and folding, and also the magnitude of the landslide velocity. Furthermore,  
868 with properly selected system force and viscous drag, the new model can describe the deposition or the halting  
869 process of the mass transport. As the external forcing vanishes, general solutions automatically reduce to the  
870 classical shock wave generated by the inviscid Burgers' equation but without domain translation, stretching  
871 and lifting. So, in contrast to the classical inviscid Burgers' equation, due to the viscous drag, our model  
872 is dissipative. This proves that the inviscid Burgers' equation is a special case of our general model. The  
873 theoretically obtained velocities are close to the often observed values in natural events including landslides  
874 and debris avalanches. This indicates the broad application potential of the new landslide velocity model and  
875 its exact analytical solutions in quickly solving engineering and technical problems in accurately estimating the

876 impact force that is very important in delineating hazard zones and for the mitigation of landslide hazards.

877 While existing analytical landslide velocity models cannot deal with the internal deformation and mostly fail  
878 to integrate a wide spectrum of externally applied forces, we developed a simple but general analytical model  
879 that is capable of including both of these important aspects. In this paper, we (i) derived a general landslide  
880 velocity model applicable to different types of landslide motions, and (ii) solve it analytically to obtain several  
881 exact solutions as a function of space and time for landslide motion, and highlight the essence of the new model.  
882 The model includes the internal deformation due to non-linear advection, and the external non-linear forcing  
883 consisting of the extensive net driving force and viscous drag. The model describes a dissipative system and  
884 involves dynamic interactions between the advection and external forcing that control the landslide deformation  
885 and motion. Our model constitutes a unique and new class of non-linear advective - dissipative system with  
886 quadratic external forcing as a function of state variable, containing all system forces. The new equation  
887 may describe the dynamical state of many extended physical and engineering problems appearing in nature,  
888 science and technology. There are two crucial novel aspects: First, it extends the classical Voellmy model  
889 and additionally explains the dynamics of locally deforming landslide providing a better and more detailed  
890 picture of the landslide motion. Second, it is a more general formulation, but can also be viewed as an  
891 extended inviscid, non-homogeneous, dissipative Burgers' equation by including the non-linear source term, as  
892 a quadratic function of the field variable. The source term accommodates the mechanics of underlying problem  
893 through the net driving force and the dissipative viscous drag.

894 Due to the non-linear advection and quadratic forcing, the new general landslide velocity model poses a great  
895 mathematical challenge to derive explicit analytical solutions. Yet, we constructed several new and general  
896 exact analytical solutions in more sophisticated forms. These solutions are strong, recover all the mass point  
897 motions in many different ways and provide much wider spectrum for the landslide velocity than the classical  
898 Voellmy and Burgers' solutions. The major role is played by the non-linear advection and system forces. The  
899 general solutions provide essentially new aspects in our understanding of landslide velocity. We have also  
900 presented a new model for the viscous drag as the ratio between one half of the system-force and the relevant  
901 kinetic energy.

902 With the general solution, we revealed that different classes of landslides can be represented by different  
903 solutions under the roof of one velocity model. General solutions allowed us to simulate the progression and  
904 stretching of the landslide. We disclose the fact that the shifting and stretching of the velocity field stem  
905 from the external forcing and non-linear advection. After a long time, as drag strongly dominates the system  
906 forces, the velocity gradient vanishes, and thus, the stretching ceases. Then, the landslide propagates down the  
907 slope just at a constant (steady-state) velocity. The general solution system can generate complex breaking  
908 waves in advective mass transport and describe the folding process of a landslide. Such phenomena have been  
909 presented and described mechanically for the first-time. The most fascinating feature is the dynamics of the  
910 wave breaking and the emergence of folding. This happens collectively as the solution system simultaneously  
911 introduces three important components of the landslide dynamics: downslope propagation and stretching of  
912 the domain, velocity up-lift, and breaking or folding in the frontal part while stretching in the rear. This  
913 physically proves that the non-uniform motion is the basic requirement for the development of breaking wave  
914 and emergence of the landslide folding. This is a novel understanding. We disclosed the fact that the translation  
915 and stretching of the domain, and lifting of the velocity field solely depends on the net driving force. Similarly,  
916 the viscous drag fully controls the shock wave generation, wave breaking and folding, and also the magnitude  
917 of the landslide velocity. Furthermore, the new model can describe the deposition or the halting process of the  
918 mass transport. As the external forcing vanishes, general solution automatically reduces to the classical shock  
919 wave generated by the inviscid Burgers' equation. This proves that the inviscid Burgers' equation is a special  
920 case of our general model.

921 The theoretically obtained velocities are close to the often observed values in natural events including landslides  
922 and debris avalanches. This indicates the broad application potential of the new landslide velocity model and  
923 its exact analytical solutions in quickly solving engineering and technical problems in accurately estimating the  
924 impact force that is very important in delineating hazard zones and for the mitigation of landslide hazards.

## 925 Acknowledgements

926 Shiva P. Pudasaini acknowledges the financial support provided by the Technical University of Munich with  
927 the Visiting Professorship Program, and the international research project: AlpSenseRely – Alpine remote  
928 sensing of climate-induced natural hazards - from the Bayerisches Staatsministerium für Umwelt und Ver-  
929 braucherschutz, Munich, Bayern. We thank the reviewers and the Associate Editor Jens Turowski for their  
930 constructive comments and suggestions that hepled to substantially improve the paper. This paper is based  
931 on: arXiv:2103.10939v1, <https://arxiv.org/pdf/2103.10939.pdf>.

## 932 Author contributions

933 The physical-mathematical models were developed by SPP who also designed and wrote the paper, interpreted  
934 the results and edited the paper through reviews. MK contributed to the discussions of the results with  
935 enhanced descriptions to better fit to the broader geosciences audiences.

## 936 References

- 937 [1] Baselt, I., de Oliveira, G.Q., Fischer, J.-T., Pudasaini, S.P., 2021. Evolution of stony debris flows in  
938 laboratory experiments. *Geomorphology*, 372, 107431. <https://doi.org/10.1016/j.geomorph.2020.107431>.
- 939 [2] Berger, C., McArdell, B.W., Schlunegger, F., 2011. Direct measurement of channel erosion by debris flows,  
940 Illgraben, Switzerland. *J. Geophys. Res. Earth Surf.* 116, F01002.
- 941 [3] Bertini, L., Cancrini, N., Jona-Lasinio, G., 1994. The Stochastic Burgers Equation. *Commun. Math. Phys.*  
942 165, 211-232.
- 943 [4] Burgers, J.M., 1948. A mathematical model illustrating the theory of turbulence. In *Advances in Applied*  
944 *Mechanics*, pp 171-199. Academic Press Inc., New York, edited by Richard von Mises and Theodore von  
945 Karman.
- 946 [5] Cascini, L., Cuomo, S., Pastor, M., Sorbino, G., Piciullo, L., 2014. SPH run-out modelling of channelized  
947 landslides of the flow type. *Geomorphology* 214, 502-513.
- 948 [6] Chalfen, M., Niemiec, A., 1986. Analytical and numerical solution of Saint-Venant equations. *Journal of*  
949 *Hydrology* 86(1-2), 1-13.
- 950 [7] Christen, M., Kowalski, J., Bartelt, P., 2010. Ramms: numerical simulation of dense snow avalanches in  
951 three-dimensional terrain. *Cold Regions Science and Technology* 63, 1-14.
- 952 [8] Christen, M., Bartelt, P., Gruber, U., 2002. AVAL-1D: an avalanche dynamics program for the practice.  
953 In Vol. 2. 1st congress “Interpraevent in the Pacific Rim”, 14 to 18 October 2002. Matsumoto, Japan.  
954 Conference proceedings “Protection of habitat against floods, debris flows and avalanches”, pp. 715-725.
- 955 [9] Cole, J.D., 1951. On a quasi-linear parabolic equation occurring in aerodynamics. *Quart. Appl. Math.* 9,  
956 225-236.
- 957 [10] Cui, P., Zeng, C., Lei, Y., 2015. Experimental analysis on the impact force of viscous debris flow. *Earth*  
958 *Surf. Process. Landf.* 40, 1644-1655.
- 959 [11] Cuomo, S., Pastor, M., Capobianco, V., Cascini, L., 2016. Modelling the space time evolution of bed  
960 entrainment for flow-like landslides. *Engineering Geology* 212, 10-20.
- 961 [12] de Haas, T., Nijland, W., de Jong, S.M., McArdell, B.W., 2020. How memory effects, check dams,  
962 and channel geometry control erosion and deposition by debris flows. *Scientific Reports.* 10, 14024.  
963 <https://doi.org/10.1038/s41598-020-71016-8>.



- 964 [13] de Haas, T., van Woerkom, T., 2016. Bed scour by debris flows: experimental investigation of effects of  
965 debris flow composition. *Earth Surf. Process. Landforms* 41, 1951-1966.
- 966 [14] Di Cristo, C., Iervolino, M., Vacca, A., 2018. Applicability of Kinematic and Diffusive models for mud-  
967 flows: a steady state analysis. *Journal of Hydrology* 559, 585-595.
- 968 [15] Dietrich, A., Krautblatter, M., 2019. Deciphering controls for debris-flow erosion derived from a liDAR-  
969 recorded extreme event and a calibrated numerical model (Rossbichelbach, Germany). *Earth Surf. Process.*  
970 *Landform* 44, 1346-1361.
- 971 [16] Dowling, C.A., Santi, P.M., 2014. Debris flows and their toll on human life: a global analysis of debris-flow  
972 fatalities from 1950 to 2011. *Nat. Hazards* 71(1), 203-227.
- 973 [17] Erismann, T.H., Abele, G., 2001. *Dynamics of Rockslides and Rockfalls*. Springer, New York.
- 974 [18] Evans, S.G., Bishop, N.F., Smoll, L.F., Murillo, P.V., Delaney, K.B., Oliver-Smith, A., 2009. A re-  
975 examination of the mechanism and human impact of catastrophic mass flows originating on Nevado  
976 Huascaran, Cordillera Blanca, Peru in 1962 and 1970. *Eng. Geol.* 108, 96-118
- 977 [19] Faug, T., 2015. Depth-averaged analytic solutions for free-surface granular flows impacting rigid walls  
978 down inclines. *Phys. Rev. E* 92. <http://dx.doi.org/10.1103/PhysRevE.92.062310>.
- 979 [20] Faug, T., Chanut, B., Beguin, R., Naaim, M., Thibert, E., Baraudi, D., 2010. A simple analytical model  
980 for pressure on obstacles induced by snow avalanches. *Ann. Glaciol.* 51 (54), 1-8.
- 981 [21] Faraoni, V., 2022. Helmholtz problem for the Riccati equation from an analogous Friedmann equation. *Eur.*  
982 *Phys. J. C* 82, 13. <https://doi.org/10.1140/epjc/s10052-021-09966-0>.
- 983 [22] Frank, F., McArdell, B.W., Huggel, C., Vieli, A., 2015. The importance of entrainment and bulking on  
984 debris flow runout modeling: examples from the Swiss Alps. *Nat. Hazards Earth Syst. Sci.* 15, 2569-2583.
- 985 [23] Gauer, P., 2018. Considerations on scaling behavior in avalanche flow along cycloidal and parabolic tracks.  
986 *Cold Regions Science and Technology* 151, 34-46.
- 987 [24] Ghosh Hajra, S., Kandel, S., Pudasaini, S.P., 2018. On analytical solutions of a two-phase mass flow model.  
988 *Nonlinear Anal. Real World Appl.* 41, 412-427.
- 989 [25] Ghosh Hajra, S., Kandel, S., Pudasaini, S.P., 2017. Optimal systems of Lie subalgebras for a two-phase  
990 mass flow. *Int. J. Non-Linear Mech.* 88, 109-121.
- 991 [26] Gubler, H., 1989. Comparison of three models of avalanche dynamics. *Annals of Glaciology* 13, 82-89.
- 992 [27] Havens, S., Marshall, H.-P., Johnson, J.B., Nicholson, B., 2014. Calculating the velocity of a fast-moving  
993 snow avalanche using an infrasound array. *Geophys. Res. Lett.* 41, 6191-6198.
- 994 [28] Highland, L.M., Bobrowsky, P., 2008. *The landslide handbook - A guide to understanding landslides:*  
995 Reston, Virginia, U.S. Geological Survey Circular 1325, 129 p.
- 996 [29] Hopf, E., 1950. The partial differential equation  $u_t + uu_x = \mu u_{xx}$ . *Comm. Pure Appl. Math.* 3, 201-230.
- 997 [30] Huggel, C., Zraggen-Oswald, S., Haerberli, W., Kääb, A., Polkvoj, A., Galushkin, I., Evans, S.G.,  
998 2005. The 2002 rock/ice avalanche at Kolka/Karmadon, Russian Caucasus: assessment of extraordinary  
999 avalanche formation and mobility, and application of QuickBird satellite imagery, *Nat. Hazards Earth*  
1000 *Syst. Sci.* 5, 173-187.
- 1001 [31] Iverson, R. M., Ouyang, C., 2015. Entrainment of bed material by earth-surface mass flows: review and  
1002 reformulation of depth-integrated theory. *Rev. Geophys.* 53(1), 27-58.

- 1003 [32] Iverson, R.M. , 2012. Elementary theory of bed-sediment entrainment by debris flows and avalanches. *J.*  
1004 *Geophys. Res.* 117, F03006.
- 1005 [33] Iverson, R., Reid, M., Logan, M. et al., 2011. Positive feedback and momentum growth during debris-flow  
1006 entrainment of wet bed sediment. *Nature Geosci.* 4, 116-121.
- 1007 [34] Johannesson, T., Gauer, P., Issler, D., Lied, K., 2009. In: Barbolini, M., Domaas, U., Harbitz, C.B.,  
1008 Johannesson, T., Gauer, P., Issler, D., Lied, K., Faug, T., Naaime, M. (Eds.), *The Design of Avalanche*  
1009 *Protection Dams. Recent Practical and Theoretical Developments.* European Commission. Directorate Gen-  
1010 eral for Research.
- 1011 [35] Kattel, P., Khattri, K., Pokhrel, P., Kafle, J., Tuladhar, B., Pudasaini, S., 2016. Simulating glacial lake  
1012 outburst floods with a two-phase mass flow model. *Annals of Glaciology* 57(71), 349-358.
- 1013 [36] Kattel, P. , Kafle, J. , Fischer, J.-T. , Mergili, M. , Tuladhar, B.M., Pudasaini, S.P., 2018. Interaction of  
1014 two-phase debris flow with obstacles. *Eng. Geol.* 242, 197-217.
- 1015 [37] Körner, H.J., 1980. The Energy-Line Method in the Mechanics of avalanches. *J. Glaciology* 26(94), 501-505.
- 1016 [38] Lanzoni, S., Gregoretti, C., Stancanelli, L.M., 2017. Coarse-grained debris flow dynamics on erodible beds.  
1017 *J. Geophys. Res. Earth Surf.* 122(3), 592-614.
- 1018 [39] Le, L., Pitman, E.B., 2009. A model for granular flows over an erodible surface. *SIAM J. Appl. Math.* 70,  
1019 1407-1427.
- 1020 [40] Li, P., Hu, K., Wang, X., 2017. Debris flow entrainment rates in non-uniform channels with convex and  
1021 concave slopes. *J. Hydraul. Res.* 56, 1-12.
- 1022 [41] Liu, W., Yang, Z., He, S., 2021. Modeling the landslide-generated debris flow from formation to propagation  
1023 and run-out by considering the effect of vegetation. *Landslides* 18, 43–58.
- 1024 [42] Liu, W., Wang, D., Zhou, J., He, S., 2019. Simulating the Xinmo landslide runout considering entrainment  
1025 effect. *Environ. Earth Sci.* 78, 585. doi:10.1007/s12665-019-8596-2.
- 1026 [43] Lu, P.Y., Yang, X.G., Xu, F.G., Hou, T.X., Zhou, J.W., 2016. An analysis of the entrainment effect of  
1027 dry debris avalanches on loose bed materials. *SpringerPlus* 5(1), 1621.
- 1028 [44] McClung, D. M., 1983. Derivation of Voellmy’s Maximum Speed and Run-Out Estimates from a Centre-  
1029 of-Mass Model. *Journal of Glaciology* 29(102), 350-352.
- 1030 [45] McCoy, S.W., Kean, J.W., Coe, J.A., Tucker, G.E., Staley, D.M., Wasklewicz, T.A., 2012. Sediment  
1031 entrainment by debris flows: In situ measurements from the headwaters of a steep catchment. *J. Geophys.*  
1032 *Res.* 117, F03016. doi:10.1029/2011JF002278.
- 1033 [46] McDougall, S., Hungr, O., 2005. Dynamic modelling of entrainment in rapid landslides. *Can. Geotech. J.*  
1034 42, 1437-1448.
- 1035 [47] Medina, V., Hürlimann, M., Bateman, A., 2008. Application of FLATModel, a 2D finite volume code, to  
1036 debris flows in the northeastern part of the Iberian Peninsula. *Landslides* 5, 127-142.
- 1037 [48] Mergili, M., Jaboyedoff, M., Pullarello, J., Pudasaini, S.P., 2020b. Back calculation of the 2017 Piz Cengalo  
1038 - Bondo landslide cascade with r.avafflow: what we can do and what we can learn. *Nat. Hazards Earth*  
1039 *Syst. Sci.* 20, 505-520.
- 1040 [49] Mergili, M., Pudasaini, S.P., Emmer, A., Fischer, J.-T., Cochachin, A., Frey, H., 2020a. Reconstruction of  
1041 the 1941 GLOF process chain at lake Palcacocha (Cordillera Blanca, Peru). *Hydrol. Earth Syst. Sci.* 24,  
1042 93-114.

- 1043 [50] Mergili, M., Emmer, A., Juricova, A., Cochachin, A., Fischer, J.-T., Huggel, C., Pudasaini, S.P., 2018.  
1044 How well can we simulate complex hydro-geomorphic process chains? The 2012 multi-lake outburst flood  
1045 in the Santa Cruz Valley (Cordillera Blanca, Peru). *Earth Surf. Proc. Land.* 43, 1373-1389.
- 1046 [51] Mergili, M., Fischer, J.-T., Krenn, J., Pudasaini, S.P., 2017. *r.avaflow v1*, an advanced open-source com-  
1047 putational framework for the propagation and interaction of two-phase mass flows. *Geosci. Model Dev.*  
1048 10(2), 553–569.
- 1049 [52] Montecinos, G.I., 2015. Analytic solutions for the Burgers equation with source terms. *arXiv:1503.09079v1*.
- 1050 [53] Nadjafikhah, M., 2009. Exact solution of generalized inviscid Burgers' equation. *arXiv:0908.3601v1*.
- 1051 [54] Perez, S., Aharonov, E., 2015. Long runout landslides: a solution from granular mechanics. *Front. Phys.*  
1052 3, 80. doi: 10.3389/fphy.2015.00080.
- 1053 [55] Perla, R., Cheng, T.T., McClung, D.M., 1980. A two-parameter model for snow-avalanche motion. *J.*  
1054 *Glaciology* 26(94), 197-207.
- 1055 [56] Pilvar, M., Pouraghniaei, M.J., Shakibaenia, A., 2019. Two-dimensional sub-aerial, submerged, and tran-  
1056 sitional granular slides. *Physics of Fluids* 31, 113303. <https://doi.org/10.1063/1.5121881>.
- 1057 [57] Pudasaini, S.P., Krautblatter, M., 2021. The mechanics of landslide mobility with erosion. *Nature Com-*  
1058 *munications* 12, 6793 (2021). <https://doi.org/10.1038/s41467-021-26959-5>.
- 1059 [58] Pudasaini, S.P., Fischer, J.-T., 2020. A mechanical erosion model for two-phase mass flows. *International*  
1060 *Journal of Multiphase Flow* 132, 103416. <https://doi.org/10.1016/j.ijmultiphaseflow.2020.103416>.
- 1061 [59] Pudasaini, S.P., 2020. A full description of generalized drag in mixture mass flows. *Engineering Geology*  
1062 265, 105429. <https://doi.org/10.1016/j.enggeo.2019.105429>.
- 1063 [60] Pudasaini, S.P., Mergili, M., 2019. A multi-phase mass flow model. *Journal of Geophysical Research: Earth*  
1064 *Surface*, 124, 2920-2942.
- 1065 [61] Pudasaini, S.P., Ghosh Hajra, S., Kandel, S., Khattri, K.B., 2018. Analytical solutions to a non-  
1066 linear diffusion-advection equation. *Zeitschrift für angewandte Mathematik und Physik* 69(6), 150.  
1067 <https://doi.org/10.1007/s00033-018-1042-6>.
- 1068 [62] Pudasaini, S.P., 2016. A novel description of fluid flow in porous and debris materials. *Eng. Geol.* 202,  
1069 62-73.
- 1070 [63] Pudasaini, S.P., Miller, S.A. , 2013. The hypermobility of huge landslides and avalanches. *Eng. Geol.* 157,  
1071 124-132.
- 1072 [64] Pudasaini, S.P., 2012. A general two-phase debris flow model. *J. Geophysics. Res.* 117, F03010.  
1073 doi:10.1029/2011JF002186.
- 1074 [65] Pudasaini, S.P., 2011. Some exact solutions for debris and avalanche flows. *Phys. Fluids* 23, 043301.  
1075 doi:10.1063/1.3570532.
- 1076 [66] Pudasaini, S.P., Hutter, K., 2007. *Avalanche Dynamics: Dynamics of Rapid Flows of Dense Granular*  
1077 *Avalanches*. Springer, Berlin, New York.
- 1078 [67] Qiao, C., Ou, G., Pan, H., 2019. Numerical modelling of the long runout character of 2015 Shenzhen  
1079 landslide with a general two-phase mass flow model. *Bull. Eng. Geol. Environ.* 78, 3281-3294.
- 1080 [68] Razis, D., Kanellopoulos, G., der Weele, K., 2018. The granular monoclinical wave. *J. Fluid Mech.* 843,  
1081 810-846.

- 1082 [69] Rui, Y., Yin, M., 2019. An Analytical Solution for the Run-Out of Submarine Debris Flows. *Marine*  
1083 *Geodesy* 42(3), 246-262.
- 1084 [70] Salm, B., 1966, Contribution to avalanche dynamics. *International Symposium on Scientific Aspects of*  
1085 *Snow and Ice Avalanches*, 1965, Davos; pp. 199-214: IAHS Publ. No. 69.
- 1086 [71] Saingier, G., Deboeuf, S., Lagree, P.-Y., 2016. On the front shape of an inertial granular flow down a  
1087 rough incline. *Physics of Fluids* 28, 053302. <https://doi.org/10.1063/1.4948401>.
- 1088 [72] Schaerer, P.A., 1975. Friction coefficients and speed of flowing avalanches. In: *Snow Mechanics: Proceed-*  
1089 *ings of the Grindelwald Symposium*, April 1974. Int. Assoc. Sci. Hydro., IAHS-AISH, Pub., 114, 425-432.
- 1090 [73] Scheidegger, A.E., 1973. On the Prediction of the Reach and Velocity of Catastrophic Landslides. *Rock*  
1091 *Mechanics* 5, 231-236.
- 1092 [74] Schürch, P., Densmore, A.L., Rosser, N.J., McArdeell, B.W., 2011. Dynamic controls on erosion and depo-  
1093 sition on debris-flow fans. *Geology* 39(9), 827-830.
- 1094 [75] Shugar, D.H., et al., 2021. A massive rock and ice avalanche caused the 2021 disaster at Chamoli, Indian  
1095 Himalaya. *Science* 373, 300-306.
- 1096 [76] Tai, Y.-C., Noelle, S., Gray, J.M.N.T., Hutter, K., 2002. Shock-capturing and front-tracking methods for  
1097 granular avalanches. *J. Comput. Phys.* 175(1), 269-301.
- 1098 [77] Tai, Y.-C., Gray, J.M.N.T., Hutter, K., Noelle, S., 2001. Flow of dense avalanches past obstructions. *Ann.*  
1099 *Glaciol.* 32, 281-284.
- 1100 [78] Theule, J.I., Liebault, F., Laigle, D., Loye, A., Jaboyedoff, M., 2015. Channel scour and fill by debris flows  
1101 and bedload transport. *Geomorphology* 243, 92-105.
- 1102 [79] Voellmy, A., 1955. Über die Zerstörungskraft von Lawinen. *Schweizerische Bauzeitung*. Jahrg. 73. Ht.  
1103 12., 159-162; Ht. 15, 212-217; Ht. 17, 246-249; Ht. 19, 280-285. On the destructive force of avalanches,  
1104 Translation No. 2. Alta. Avalanche Study Center, USDA, Forest Service, 1964.
- 1105 [80] Walter, F., Amann, S., Kos, A., Kenner, R., Phillips, M., de Preux, A., Huss, M., Tognacca, C.,  
1106 Clinton, J., Diehl, T., Bonanomi, Y., 2020. Direct observations of a three million cubic meter rock-  
1107 slope collapse with almost immediate initiation of ensuing debris flows. *Geomorphology* 351, 106933.  
1108 <https://doi.org/10.1016/j.geomorph.2019.106933>.
